# Supplementary material for: Medical cannabis use in Thailand after its legalization: a respondent-driven sample survey
Source: PeerJ journal article supplement (doi:10.7717/peerj.12809), 2022-01-11
Supplement: Quantitative_questionnaire-Eng.pdf [file Quantitative_questionnaire-Eng.pdf]

[ ] 2) no, why?.....

6. Have you ever stopped using medical cannabis? [ ] 1) no (skip to 6) [ ] 2) yes  
 Why stopped [ ] 1) illegal [ ] 2) too expensive [ ] 3) not trust its quality  
 [ ] 4) pressure from other people [ ] 5) cannabis cannot treat the present illness  
 [ ] 6) feel guilty [ ] 7) doctor advised not to use [ ] 8) doctor advised to use but I think it's not necessary  
 [ ] 9) cannot find cannabis to use [ ] 9) Other, specify.....

7. Pattern of medical cannabis use in the past 12 months (asking one by one disease)

| Disease/symptom                    | 1.<br><br>(if CA, specify organ)                                                                                    | 2.<br><br>(if CA, specify organ)                                                                                    |
|------------------------------------|---------------------------------------------------------------------------------------------------------------------|---------------------------------------------------------------------------------------------------------------------|
| Who diagnosed?                     | [ ] 1 self [ ] 2 doctor<br>[ ] 3 TM doctor<br>[ ] 4 other .....                                                     | [ ] 1 self [ ] 2 doctor<br>[ ] 3 TM doctor<br>[ ] 4 other .....                                                     |
| For how long                       | .....y.....m.....d                                                                                                  | .....y.....m.....d                                                                                                  |
| Started cannabis                   | date.....mo.....B.C.....                                                                                            | date.....mo.....B.C.....                                                                                            |
| Form of cannabis                   | (for oil specify THC/CBD and % conc.)                                                                               | (for oil specify THC/CBD and % conc.)                                                                               |
| Method of use                      |                                                                                                                     |                                                                                                                     |
| Frequency                          | [ ] 1) many times/d [ ] 2) 6-7 d/w<br>[ ] 3) 3-5 d/w [ ] 4) 1-2 d/w<br>[ ] 5) ,1 d/w [ ] 6) 1/month [ ] 7) <1/month | [ ] 1) many times/d [ ] 2) 6-7 d/w<br>[ ] 3) 3-5 d/w [ ] 4) 1-2 d/w<br>[ ] 5) ,1 d/w [ ] 6) 1/month [ ] 7) <1/month |
| Quantity/time                      | (Quantity).....(Unit).....                                                                                          | (Quantity).....(Unit).....                                                                                          |
| Price                              | .....Baht/unit                                                                                                      | .....Baht/unit                                                                                                      |
| Bought/got from                    | (give detail)                                                                                                       | (give detail)                                                                                                       |
| First use                          | date.....mo.....B.C.....                                                                                            | date.....mo.....B.C.....                                                                                            |
| Latest buy                         | date.....mo.....B.C.....                                                                                            | date.....mo.....B.C.....                                                                                            |
| Latest price                       | (Unit).....p.....Baht                                                                                               | (Unit).....p.....Baht                                                                                               |
| Method of buying                   |                                                                                                                     |                                                                                                                     |
| Change of disease after use        | [ ] 1 very much better [ ] 2 better<br>[ ] 3 same<br>[ ] 4 worse [ ] 5 very much worse                              | [ ] 1 very much better [ ] 2 better<br>[ ] 3 same<br>[ ] 4 worse [ ] 5 very much worse                              |
| Change of quantity after first use | [ ] 1 very much increase<br>[ ] 2 increase [ ] 3 same<br>[ ] 4 decrease [ ] 5 very much decrease                    | [ ] 1 very much increase<br>[ ] 2 increase [ ] 3 same<br>[ ] 4 decrease [ ] 5 very much decrease                    |

|                                           |                                                                                                              |                                                                                                              |
|-------------------------------------------|--------------------------------------------------------------------------------------------------------------|--------------------------------------------------------------------------------------------------------------|
| <b>Disease/symptom</b>                    | 3.<br><br>(if CA, specify organ)                                                                             | 4.<br><br>(if CA, specify organ)                                                                             |
| <b>Who diagnosed?</b>                     | [ ] 1 self [ ] 2 doctor<br>[ ] 3 TM doctor<br>[ ] 4 other .....                                              | [ ] 1 self [ ] 2 doctor<br>[ ] 3 TM doctor<br>[ ] 4 other .....                                              |
| <b>For how long</b>                       | .....y.....m.....d                                                                                           | .....y.....m.....d                                                                                           |
| <b>Started cannabis</b>                   | date.....mo.....B.C.....                                                                                     | date.....mo..... B.C.....                                                                                    |
| <b>Form of cannabis</b>                   | (for oil specify THC/CBD and % conc.)                                                                        | (for oil specify THC/CBD and % conc.)                                                                        |
| <b>Method of use</b>                      |                                                                                                              |                                                                                                              |
| <b>Frequency</b>                          | [ ]1) many times/d [ ]2) 6-7 d/w<br>[ ]3) 3-5 d/w [ ]4) 1-2 d/w<br>[ ]5) ,1 d/w [ ]6) 1/month [ ]7) <1/month | [ ]1) many times/d [ ]2) 6-7 d/w<br>[ ]3) 3-5 d/w [ ]4) 1-2 d/w<br>[ ]5) ,1 d/w [ ]6) 1/month [ ]7) <1/month |
| <b>Quantity/time</b>                      | (Quantity).....(Unit).....                                                                                   | (Quantity).....(Unit).....                                                                                   |
| <b>Price</b>                              | .....Baht/unit                                                                                               | .....Baht/unit                                                                                               |
| <b>Bought/got from</b>                    | (give detail)                                                                                                | (give detail)                                                                                                |
| <b>First use</b>                          | date.....mo.....B.C.....                                                                                     | date.....mo.....B.C.....                                                                                     |
| <b>Latest buy</b>                         | date.....mo.....B.C.....                                                                                     | date.....mo.....B.C.....                                                                                     |
| <b>Latest price</b>                       | (Unit)..... p.....Baht                                                                                       | (Unit)..... p.....Baht                                                                                       |
| <b>Method of buying</b>                   |                                                                                                              |                                                                                                              |
| <b>Change of disease after use</b>        | [ ]1) very much better [ ]2) better<br>[ ]3) same<br>[ ]4) worse [ ]5) very much worse                       | [ ]1) very much better [ ]2) better<br>[ ]3) same<br>[ ]4) worse [ ]5) very much worse                       |
| <b>Change of quantity after first use</b> | [ ]1) very much increase<br>[ ]2) increase [ ]3) same<br>[ ]4) decrease [ ]5) very much decrease             | [ ]1) very much increase<br>[ ]2) increase [ ]3) same<br>[ ]4) decrease [ ]5) very much decrease             |

**Form of cannabis product** 1. Flower/leaf/root 2. Oil extract 3. Soft gel 4. powder 5. Cream/ba  
6. coffee 7. Cookie/cake 8. soap 9. lipstick 10. spray 11. Other, specify .....

**Method of use** 1. smoke (mix in cigarette, joint) 2. Drink pure or mixed with water 3. sublingual 4. Rectal  
suppository 5. Put in capsule and eat 6. Spray/topical put on 7. Drink as tea 8. Vaporization 9.  
Other, specify .....

**Method of buying/obtaining** 1. Order from website 2. Order from social media 3. Doctor prescribed 4. TM doctor/folk healer  
5. pharmacist 6. Other healthcare worker..... 7. Network, association, user group

8. Government organization      9. Overseas shop   10. Home grown/production      11. Underground dealer  
 12. Other, specify.....

**Part 4 Perception of benefits and harms**

1. From where did you receive information about medical cannabis?  
 [ ] 1. Network, association, group, specify.....  
 [ ] 2. Hospital, specify.....  
 [ ] 3. Sale website, specify.....  
 [ ] 4. Social media. ....  
 [ ] 5.friend.....  
 [ ] 6.seller.....  
 [ ] 7. government organization.....  
 [ ] 8. Other, specify.....

| Perception of benefit and harm: Cannabis can...                             | ใช่ | ไม่ใช่ |
|-----------------------------------------------------------------------------|-----|--------|
| 1. Treat chronic pain in adults                                             |     |        |
| 2. An antiemesis for patients who receive chemotherapy                      |     |        |
| 3. Improve spasticity                                                       |     |        |
| 4. Improve insomnia                                                         |     |        |
| 5. Increase appetite in HIV/AIDS patients                                   |     |        |
| 6. Improve anxiety symptoms                                                 |     |        |
| 7. Improve PTSD symptoms                                                    |     |        |
| 8. Treat cancers                                                            |     |        |
| 9. Treat brain tumour                                                       |     |        |
| 10. Treat anorexia, malnutrition from cancer                                |     |        |
| 11. Treat epilepsy                                                          |     |        |
| 12. Treat Parkinson's disease                                               |     |        |
| 13. Treat substance dependence                                              |     |        |
| 14. Reduce nausea and vomiting                                              |     |        |
| 15. Treat intractable epilepsy in children and treatment resistant epilepsy |     |        |
| 16. Treat spasticity form multiple sclerosis                                |     |        |
| 17. Treat Alzheimer's disease                                               |     |        |
| 18. Treat multiple sclerosis                                                |     |        |

| Perception of benefit and harm: Cannabis can...               | ใช่ | ไม่ใช่ |
|---------------------------------------------------------------|-----|--------|
| 19. Treat generalized anxiety disorder                        |     |        |
| 20. Decrease severity of chronic cough                        |     |        |
| 21. Cause Palpitations                                        |     |        |
| 22. Cause Panic symptoms                                      |     |        |
| 23. Cause Dementia, memory impairment, amotivation            |     |        |
| 24. Cause Schizophrenia-like psychotic symptoms               |     |        |
| 25. Cause Severe dry mouth                                    |     |        |
| 26. Cause Slow reaction time, abnormal sensory-motor function |     |        |
| 27. Cause Hallucinations                                      |     |        |
| 28. Cause Acute hypotension                                   |     |        |
| 29. Cause Decreased sperm count, infertility                  |     |        |
| 30. Cause Ataxia, uncontrollable body coordination            |     |        |
| 31. Cause Blurred vision                                      |     |        |
| 32. Cause Hepatitis                                           |     |        |

**Part 5: Opinion towards cannabis policy in Thailand**

| Statement                                                                          | Strongly agree | agree | neutral | disagree | Strongly disagree |
|------------------------------------------------------------------------------------|----------------|-------|---------|----------|-------------------|
| 1 Thailand should allow people over 20 years old use cannabis for medical purpose. |                |       |         |          |                   |
| 2 Adults can use cannabis even being in front of children                          |                |       |         |          |                   |
| 3 If parents use cannabis it will stimulate children to use it.                    |                |       |         |          |                   |
| 4 Thailand should allow selling cannabis products for medical purpose.             |                |       |         |          |                   |
| 5 Thailand should allow selling cannabis products for recreational purpose.        |                |       |         |          |                   |
| 6 Thailand should allow people grow cannabis for medical purpose.                  |                |       |         |          |                   |

| Statement                                                                                                                       | Strongly agree | agree | neutral | disagree | Strongly disagree |
|---------------------------------------------------------------------------------------------------------------------------------|----------------|-------|---------|----------|-------------------|
| 7 Thailand should allow people grow cannabis for recreational purpose.                                                          |                |       |         |          |                   |
| 8 Cannabis industry will produce large income to the country                                                                    |                |       |         |          |                   |
| 9 Cannabis should remain drug of abuse either for medical or recreational use as that in the past (before legalization in 2019) |                |       |         |          |                   |
| 10 Cannabis should be under a strict law at the same level as heroin and methamphetamine                                        |                |       |         |          |                   |
| 11 Cannabis should be under a control law at the same level as alcohol                                                          |                |       |         |          |                   |
| 12 Cannabis should be under a control law at the same level as tobacco                                                          |                |       |         |          |                   |
