# Supplementary material for: Medical cannabis use in Thailand after its legalization: a respondent-driven sample survey
Source: PeerJ journal article supplement (doi:10.7717/peerj.12809), 2022-01-11
Supplement: Questionnaire-Thai.pdf [file Questionnaire-Thai.pdf]

**ส่วนที่ 3 การใช้กัญชาทางการแพทย์**

1. ท่านเริ่มนำใช้กัญชามาใช้เพื่อทางการแพทย์หรือเพื่อการรักษาโรค บรรเทาอาการเจ็บป่วยครั้งแรกเมื่ออายุ .....ปี
2. ท่านใช้กัญชาเพื่อวัตถุประสงค์ทางการแพทย์มาแล้วเป็นเวลานานเท่าใด .....ปี.....เดือน.....วัน
3. เหตุใดท่านจึงตัดสินใจใช้กัญชาเพื่อรักษาโรคของท่าน ระบุ.....  
.....  
.....
4. ปัจจุบันท่านใช้ยาแผนปัจจุบันอยู่ด้วยหรือไม่ [  ] 1) ใช่ [  ] 2) ไม่ใช่
5. ปัจจุบันท่านได้ลดหรือเลิกการใช้ยาแผนปัจจุบัน หลังจากที่ได้รับกัญชาทางการแพทย์หรือไม่  
[  ] 1) ใช่ โปรดอธิบายเหตุผล .....  
.....  
[  ] 2) ไม่ใช่ โปรดอธิบายเหตุผล.....  
.....
6. ท่านเคยหยุดใช้กัญชาเพื่อการรักษาโรคหรือไม่ [  ] 1) ไม่เคยหยุด (ข้ามไปข้อ 6) [  ] 2) เคยหยุด  
เคยหยุด เพราะอะไร [  ] 1) ผิดกฎหมาย [  ] 2) แพงเกินไป [  ] 3) ไม่มั่นใจในคุณภาพของกัญชา  
[  ] 4) รู้สึกกดดันจากคนรอบข้าง [  ] 5) กัญชาไม่สามารถรักษาโรคที่กำลังเป็นอยู่ [  ] 6) ใช้แล้วรู้สึกผิด  
[  ] 7) แพทย์ไม่แนะนำให้ใช้ [  ] 8) แพทย์แนะนำให้ใช้ แต่ตัวเองคิดว่ายังไม่ต้องใช้  
[  ] 9) ไม่สามารถหากัญชามาใช้ได้ [  ] 9) อื่น ๆ.....
7. ลักษณะการใช้กัญชาเพื่อการรักษาโรค ในช่วง 12 เดือนที่ผ่านมา (ให้ถามทีละโรค)

| ชื่อโรค/อาการป่วย             | 1.<br>(ถ้าเป็นมะเร็ง ระบุระยะด้วย)                                                                                                                                                                                                                                                                                                                                             | 2.<br>(ถ้าเป็นมะเร็ง ระบุระยะด้วย)                                                                                                                                              |
|-------------------------------|--------------------------------------------------------------------------------------------------------------------------------------------------------------------------------------------------------------------------------------------------------------------------------------------------------------------------------------------------------------------------------|---------------------------------------------------------------------------------------------------------------------------------------------------------------------------------|
| ผู้วินิจฉัย                   | [ <input type="checkbox"/> ] 1 ตัวเอง [ <input type="checkbox"/> ] 2 แพทย์แผนปัจจุบัน<br>[ <input type="checkbox"/> ] 3 แพทย์แผนไทย [ <input type="checkbox"/> ] 4 คนอื่น .....                                                                                                                                                                                                | [ <input type="checkbox"/> ] 1 ตัวเอง [ <input type="checkbox"/> ] 2 แพทย์แผนปัจจุบัน<br>[ <input type="checkbox"/> ] 3 แพทย์แผนไทย [ <input type="checkbox"/> ] 4 คนอื่น ..... |
| ป่วยมานาน                     | .....ปี.....เดือน.....วัน                                                                                                                                                                                                                                                                                                                                                      | .....ปี.....เดือน.....วัน                                                                                                                                                       |
| เริ่มใช้ยากัญชา               | วันที่.....เดือน.....พ.ศ.....                                                                                                                                                                                                                                                                                                                                                  | วันที่.....เดือน.....พ.ศ.....                                                                                                                                                   |
| รูปแบบของผลิตภัณฑ์กัญชาที่ใช้ | (ถ้าใช้น้ำมันสกัด ระบุชนิด THC/CBD และ % ความเข้มข้น)                                                                                                                                                                                                                                                                                                                          | (ถ้าใช้น้ำมันสกัด ระบุชนิด THC/CBD และ % ความเข้มข้น)                                                                                                                           |
| วิธีใช้                       |                                                                                                                                                                                                                                                                                                                                                                                |                                                                                                                                                                                 |
| ความถี่ของการใช้              | [ <input type="checkbox"/> ] 1) หลายครั้งต่อวัน [ <input type="checkbox"/> ] 2) 6-7 วันต่อสัปดาห์<br>[ <input type="checkbox"/> ] 3) 3-5 วันต่อสัปดาห์ [ <input type="checkbox"/> ] 4) 1-2 วันต่อสัปดาห์<br>[ <input type="checkbox"/> ] 5) น้อยกว่าสัปดาห์ละครั้ง [ <input type="checkbox"/> ] 6) เดือนละ 1 ครั้ง<br>[ <input type="checkbox"/> ] 7) น้อยกว่าเดือนละ 1 ครั้ง) | 1) หลายครั้งต่อวัน 2) 6-7 วันต่อสัปดาห์<br>3) 3-5 วันต่อสัปดาห์ 4) 1-2 วันต่อสัปดาห์<br>5) น้อยกว่าสัปดาห์ละครั้ง 6) เดือนละ 1 ครั้ง<br>7) น้อยกว่าเดือนละ 1 ครั้ง)             |
| ปริมาณที่ใช้ต่อครั้ง          | (จำนวน).....(หน่วย).....                                                                                                                                                                                                                                                                                                                                                       | (จำนวน).....(หน่วย).....                                                                                                                                                        |
| ราคา                          | หน่วยละ.....บาท                                                                                                                                                                                                                                                                                                                                                                | หน่วยละ.....บาท                                                                                                                                                                 |
| ชื่อ/ได้รับกัญชาจาก           | (ระบุผู้ขาย/ให้ยา/สถานที่โดยละเอียด)                                                                                                                                                                                                                                                                                                                                           | (ระบุผู้ขาย/ให้ยา/สถานที่โดยละเอียด)                                                                                                                                            |
| ชื่อ/ได้รับครั้งแรกสุดเมื่อ   | วันที่.....เดือน.....พ.ศ.....                                                                                                                                                                                                                                                                                                                                                  | วันที่.....เดือน.....พ.ศ.....                                                                                                                                                   |
| ชื่อ/ได้รับครั้งสุดท้ายเมื่อ  | วันที่.....เดือน.....พ.ศ.....                                                                                                                                                                                                                                                                                                                                                  | วันที่.....เดือน.....พ.ศ.....                                                                                                                                                   |

|                                                                      |                                                                                                     |                                                                                                     |
|----------------------------------------------------------------------|-----------------------------------------------------------------------------------------------------|-----------------------------------------------------------------------------------------------------|
| ครั้งล่าสุดที่ซื้อราคา                                               | (หน่วย)..... ละ.....บาท                                                                             | (หน่วย)..... ละ.....บาท                                                                             |
| วิธีการซื้อ/ได้รับ                                                   |                                                                                                     |                                                                                                     |
| หลังจากมีอาการโรค<br>เปลี่ยนไปอย่างไร                                | [ ] 1 ดีขึ้นมาก [ ] 2 ดีขึ้น [ ] 3 เหมือนเดิม<br>[ ] 4 แย่ลง [ ] 5 แย่ลงมาก                         | [ ] 1 ดีขึ้นมาก [ ] 2 ดีขึ้น [ ] 3 เหมือนเดิม<br>[ ] 4 แย่ลง [ ] 5 แย่ลงมาก                         |
| ปริมาณกัญชาที่ใช้<br>เปลี่ยนแปลงไปหลังจาก<br>เริ่มใช้ครั้งแรกหรือไม่ | [ ] 1 ใช้เพิ่มขึ้นมาก [ ] 2 ใช้เพิ่มขึ้น<br>[ ] 3 ใช้เท่าเดิม [ ] 4 ใช้น้อยลง<br>[ ] 5 ใช้น้อยลงมาก | [ ] 1 ใช้เพิ่มขึ้นมาก [ ] 2 ใช้เพิ่มขึ้น<br>[ ] 3 ใช้เท่าเดิม [ ] 4 ใช้น้อยลง<br>[ ] 5 ใช้น้อยลงมาก |

|                                                                      |                                                                                                                                                                                                 |                                                                                                                                                                     |
|----------------------------------------------------------------------|-------------------------------------------------------------------------------------------------------------------------------------------------------------------------------------------------|---------------------------------------------------------------------------------------------------------------------------------------------------------------------|
| ชื่อโรค/อาการป่วย                                                    | 3.<br><br>(ถ้าเป็นมะเร็ง ระบุวัยด้วย)                                                                                                                                                           | 4.<br><br>(ถ้าเป็นมะเร็ง ระบุวัยด้วย)                                                                                                                               |
| ผู้วินิจฉัย                                                          | [ ] 1 ตัวเอง [ ] 2 แพทย์แผนปัจจุบัน<br>[ ] 3 แพทย์แผนไทย [ ] 4 คนอื่น .....                                                                                                                     | [ ] 1 ตัวเอง [ ] 2 แพทย์แผนปัจจุบัน<br>[ ] 3 แพทย์แผนไทย [ ] 4 คนอื่น .....                                                                                         |
| ป่วยมานาน                                                            | .....ปี.....เดือน.....วัน                                                                                                                                                                       | .....ปี.....เดือน.....วัน                                                                                                                                           |
| เริ่มใช้ยา/กัญชา                                                     | วันที่.....เดือน.....พ.ศ.....                                                                                                                                                                   | วันที่.....เดือน.....พ.ศ.....                                                                                                                                       |
| รูปแบบของกัญชาที่ใช้                                                 | (ถ้าใช้น้ำมันสกัด ระบุชนิด THC/CBD และ % ความเข้มข้น)                                                                                                                                           | (ถ้าใช้น้ำมันสกัด ระบุชนิด THC/CBD และ % ความเข้มข้น)                                                                                                               |
| วิธีใช้                                                              |                                                                                                                                                                                                 |                                                                                                                                                                     |
| ความถี่ของการใช้                                                     | [ ] 1) หลายครั้งต่อวัน [ ] 2) 6-7 วันต่อสัปดาห์<br>[ ] 3) 3-5 วันต่อสัปดาห์ [ ] 4) 1-2 วันต่อสัปดาห์<br>[ ] 5) น้อยกว่าสัปดาห์ละครั้ง [ ] 6) เดือนละ 1 ครั้ง<br>[ ] 7) น้อยกว่าเดือนละ 1 ครั้ง) | 1) หลายครั้งต่อวัน 2) 6-7 วันต่อสัปดาห์<br>3) 3-5 วันต่อสัปดาห์ 4) 1-2 วันต่อสัปดาห์<br>5) น้อยกว่าสัปดาห์ละครั้ง 6) เดือนละ 1 ครั้ง<br>7) น้อยกว่าเดือนละ 1 ครั้ง) |
| ปริมาณ                                                               | (จำนวน).....(หน่วย).....                                                                                                                                                                        | (จำนวน).....(หน่วย).....                                                                                                                                            |
| ราคา                                                                 | หน่วยละ.....บาท                                                                                                                                                                                 | หน่วยละ.....บาท                                                                                                                                                     |
| ซื้อ/ได้รับกัญชาจาก                                                  | (ระบุผู้ขาย/ให้ยา/สถานที่โดยละเอียด)                                                                                                                                                            | (ระบุผู้จ่ายยา/สถานที่โดยละเอียด)                                                                                                                                   |
| ซื้อ/ได้รับครั้งแรกสุดเมื่อ                                          | วันที่.....เดือน.....พ.ศ.....                                                                                                                                                                   | วันที่.....เดือน.....พ.ศ.....                                                                                                                                       |
| ซื้อ/ได้รับครั้งสุดท้ายเมื่อ                                         | วันที่.....เดือน.....พ.ศ.....                                                                                                                                                                   | วันที่.....เดือน.....พ.ศ.....                                                                                                                                       |
| ครั้งล่าสุดที่ซื้อราคา                                               | (หน่วย)..... ละ.....บาท                                                                                                                                                                         | (หน่วย)..... ละ.....บาท                                                                                                                                             |
| วิธีการซื้อ/ได้รับ                                                   |                                                                                                                                                                                                 |                                                                                                                                                                     |
| หลังจากมีอาการโรค<br>เปลี่ยนไปอย่างไร                                | [ ] 1 ดีขึ้นมาก [ ] 2 ดีขึ้น [ ] 3 เหมือนเดิม<br>[ ] 4 แย่ลง [ ] 5 แย่ลงมาก                                                                                                                     | [ ] 1 ดีขึ้นมาก [ ] 2 ดีขึ้น [ ] 3 เหมือนเดิม<br>[ ] 4 แย่ลง [ ] 5 แย่ลงมาก                                                                                         |
| ปริมาณกัญชาที่ใช้<br>เปลี่ยนแปลงไปหลังจาก<br>เริ่มใช้ครั้งแรกหรือไม่ | [ ] 1 ใช้เพิ่มขึ้นมาก [ ] 2 ใช้เพิ่มขึ้น<br>[ ] 3 ใช้เท่าเดิม [ ] 4 ใช้น้อยลง<br>[ ] 5 ใช้น้อยลงมาก                                                                                             | [ ] 1 ใช้เพิ่มขึ้นมาก [ ] 2 ใช้เพิ่มขึ้น<br>[ ] 3 ใช้เท่าเดิม [ ] 4 ใช้น้อยลง<br>[ ] 5 ใช้น้อยลงมาก                                                                 |

**รูปแบบของผลิตภัณฑ์กัญชาที่ใช้** 1. ดอก/ใบสด/แห้ง 2. น้ำมันสกัด 3. ซอฟเจล 4. ผง 5. ครีม/บาล์ม/ยาหม่องทาผิว

6. กาแฟ 7. ลูกอม/ขนม 8. สบู่ 9. ลิปสติค 10. สเปรย์ 11. อื่น ๆ .....

**วิธีใช้** 1. สูบ (ผสมบุหรี่ย บ่อน้ำ/แห้ง) 2. กิน/ดื่มหรือผสมน้ำ 3. หยดใต้ลิ้น 4. เหน็บ/สวนทวาร 5. บรรจุในแคปซูลและกิน

6. ฟัน/ทา/อาบน้ำภายนอก 7. ต้ม/ชา/ชงดื่มเป็นชา 8. ใช้ Vaporization 9. อื่น ๆ .....

**วิธีการซื้อ/ได้รับยา/กัญชา** 1. สั่งซื้อจากเว็บไซต์ขายออนไลน์ 2. สั่งซื้อจากโซเชียลมีเดีย เช่น เฟสบุ๊ก line อินสตาแกรม เป็นต้น 3. แพทย์แผนปัจจุบันสั่งจ่ายให้

4. แพทย์พื้นบ้าน/แผนไทยสั่งจ่ายให้ 5. เคาส์กร 6. บุคลากรสุขภาพอื่น ๆ..... 7. ได้จากชมรม สมาคม เครือข่ายกลุ่มผู้ใช้กัญชา

8. หน่วยงานรัฐบาล 9. ร้านค้าในต่างประเทศ 10. ปลูก/ผลิตเอง 11. ผู้ขายยาในตลาดมืด 12. อื่น ๆ ระบุ.....

**ส่วนที่ 4 การเข้าถึงกัญชา**

1. ท่านได้รับข้อมูลข่าวสารกัญชาหรือสารสกัดของกัญชาได้จากที่ใด

- [ ] 1. ชมรม สมาคม กลุ่มผู้ใช้กัญชา สมาพันธ์ ระบุ.....
- [ ] 2. จากโรงพยาบาล ระบุ.....
- [ ] 3. จากเว็บไซต์ขายออนไลน์ ระบุ.....
- [ ] 4. จากโซเชียลมีเดีย เช่น เฟซบุ๊ก line อินสตาแกรม เป็นต้น ระบุ.....
- [ ] 5. จากเพื่อน ระบุระดับความสัมพันธ์.....
- [ ] 6. จากผู้ขายที่ขาย ระบุ.....
- [ ] 7. จากหน่วยงานรัฐบาล ระบุ.....
- [ ] 8. อื่นๆ ระบุ.....

| การรับรู้ต่อประโยชน์และโทษของการใช้กัญชา                                                 | ใช่ | ไม่ใช่ |
|------------------------------------------------------------------------------------------|-----|--------|
| 1. กัญชาสามารถรักษาอาการปวดเรื้อรังในผู้ใหญ่                                             |     |        |
| 2. กัญชาเป็นยาต้านอาการอาเจียน ในการรักษาภาวะคลื่นไส้อาเจียนที่เกิดจากการได้รับเคมีบำบัด |     |        |
| 3. กัญชาช่วยทำให้อาการกล้ามเนื้อเกร็งลดลง                                                |     |        |
| 4. กัญชาช่วยให้อาการนอนหลับดีขึ้นในผู้ที่มีปัญหาการนอนหลับ                               |     |        |
| 5. กัญชาเพิ่มความอยากอาหาร และลดการสูญเสียน้ำหนักในผู้ป่วย HIV/AIDS                      |     |        |
| 6. กัญชาช่วยทำให้อาการวิตกกังวลดีขึ้น                                                    |     |        |
| 7. กัญชาช่วยทำให้อาการของโรคเครียดหลังเผชิญภัยพิบัติดีขึ้น                               |     |        |
| 8. กัญชาช่วยรักษาโรคมะเร็ง                                                               |     |        |
| 9. กัญชาช่วยรักษาโรคเนื้องอกในสมอง                                                       |     |        |
| 10. กัญชาช่วยรักษาอาการผอมแห้งภาวะทุพโภชนาการจากโรคมะเร็ง                                |     |        |
| 11. กัญชาช่วยรักษาโรคลมชัก                                                               |     |        |
| 12. กัญชาช่วยรักษาโรคพาร์กินสัน                                                          |     |        |
| 13. กัญชาช่วยรักษาภาวะติดสารเสพติด                                                       |     |        |
| 14. กัญชาช่วยลดภาวะคลื่นไส้อาเจียนจากเคมีบำบัด                                           |     |        |
| 15. กัญชาช่วยรักษาโรคลมชักรักษายากในเด็ก & โรคลมชักที่ดื้อต่อการรักษา                    |     |        |
| 16. กัญชาช่วยรักษาภาวะกล้ามเนื้อหดเกร็งในผู้ป่วยปลอกประสาทเสื่อมแข็ง                     |     |        |
| 17. กัญชาช่วยรักษาโรคอัลไซเมอร์                                                          |     |        |

| การรับรู้ต่อประโยชน์และโทษของการใช้กัญชา                                                                | ใช่ | ไม่ใช่ |
|---------------------------------------------------------------------------------------------------------|-----|--------|
| 18. กัญชาช่วยรักษาโรคปลอกประสาทอักเสบ                                                                   |     |        |
| 19. กัญชาช่วยรักษาโรควิดก้างวลไปทั่ว                                                                    |     |        |
| 20. กัญชาช่วยลดอาการไอเรื้อรัง                                                                          |     |        |
| 21. กัญชาทำให้เกิดภาวะหัวใจเต้นเร็วผิดปกติได้                                                           |     |        |
| 22. กัญชาทำให้เกิดภาวะตื่นตระหนก (แพนิก) ได้                                                            |     |        |
| 23. กัญชาทำให้เกิดภาวะสมองเสื่อม ความจำเสื่อม หมดแรงจูงใจในชีวิตได้                                     |     |        |
| 24. กัญชาทำให้เกิดอาการโรคจิตคล้ายผู้ที่เป็นโรคจิตเภทได้                                                |     |        |
| 25. กัญชาทำให้เกิดอาการปากแห้งอย่างรุนแรงได้                                                            |     |        |
| 26. กัญชาทำให้เกิดปฏิกิริยาการตอบสนองช้า ประสาทการเคลื่อนไหวผิดปกติ เพิ่มความเสี่ยงของการเกิดอุบัติเหตุ |     |        |
| 27. กัญชาทำให้เกิดภาวะประสาทหลอน                                                                        |     |        |
| 28. กัญชาทำให้เกิดภาวะความดันโลหิตตกฉับพลัน                                                             |     |        |
| 29. กัญชาทำให้จำนวนสเปิร์มลดลง มีบุตรยาก                                                                |     |        |
| 30. กัญชาทำให้เดินเซ ควบคุมร่างกายได้ไม่ดีได้                                                           |     |        |
| 31. กัญชาทำให้เกิดอาการตาพร่ามัวได้                                                                     |     |        |
| 32. กัญชาทำให้เกิดโรคตับอักเสบ                                                                          |     |        |

### ส่วนที่ 5 ความเห็นด้านการจัดการนโยบายกัญชาในอนาคตของประเทศไทย

| คำถาม                                                                                         | เห็นด้วย<br>อย่างยิ่ง | เห็นด้วย | เฉย ๆ | ไม่เห็นด้วย | ไม่เห็นด้วย<br>อย่างยิ่ง |
|-----------------------------------------------------------------------------------------------|-----------------------|----------|-------|-------------|--------------------------|
| 1 ประเทศไทยควรอนุญาตให้บุคคลที่บรรลุนิติภาวะแล้วสามารถใช้กัญชาเพื่อวัตถุประสงค์ทางการแพทย์ได้ |                       |          |       |             |                          |
| 2 ผู้ใหญ่สามารถใช้กัญชาทางการแพทย์ได้แม้ว่าอยู่ต่อหน้าเด็กก็ตาม                               |                       |          |       |             |                          |
| 3 ถ้าผู้ปกครองใช้กัญชาทางการแพทย์จะเป็นการกระตุ้นให้เด็กอยากใช้กัญชามากขึ้น                   |                       |          |       |             |                          |
| 4 ประเทศไทยควรอนุญาตให้จำหน่ายผลิตภัณฑ์แปรรูปจากกัญชาใช้เพื่อการแพทย์ได้                      |                       |          |       |             |                          |

| คำถาม                                                                                                         | เห็นด้วย<br>อย่างยิ่ง | เห็นด้วย | เฉย ๆ | ไม่เห็นด้วย | ไม่เห็นด้วย<br>อย่างยิ่ง |
|---------------------------------------------------------------------------------------------------------------|-----------------------|----------|-------|-------------|--------------------------|
| 5 ประเทศไทยควรอนุญาตให้จำหน่ายผลิตภัณฑ์แปรรูปจากกัญชาใช้เพื่อการผ่อนคลายได้                                   |                       |          |       |             |                          |
| 6 ประเทศไทยควรอนุญาตประชาชนทั่วไป มีสิทธิในการปลูกกัญชา เพื่อวัตถุประสงค์ทางการแพทย์ได้                       |                       |          |       |             |                          |
| 7 ประเทศไทยควรอนุญาตให้ประชาชนทั่วไป มีสิทธิปลูกกัญชาเพื่อวัตถุประสงค์ในการผ่อนคลายได้                        |                       |          |       |             |                          |
| 8 อุตสาหกรรมกัญชาจะทำรายได้จำนวนมากให้กับประเทศ                                                               |                       |          |       |             |                          |
| 9 กัญชาควรเป็นสารเสพติดให้โทษทั้งในกรณีที่ใช้เพื่อการแพทย์และ เหตุผลอื่น ดังที่เคยเป็นในอดีต (ก่อน พ.ศ. 2562) |                       |          |       |             |                          |
| 10 กัญชาควรมีกฎหมายควบคุมเช่นเดียวกับยาเสพติดรุนแรง เช่น ยาบ้า หรือ เฮโรอีน                                   |                       |          |       |             |                          |
| 11 กัญชาควรมีกฎหมายควบคุมเช่นเดียวกับเครื่องดื่มแอลกอฮอล์                                                     |                       |          |       |             |                          |
| 12 กัญชาควรมีกฎหมายควบคุมเช่นเดียวกับยาสูบ บุหรี่                                                             |                       |          |       |             |                          |
