# Supplementary material for: Medical cannabis use in Thailand after its legalization: a respondent-driven sample survey
Source: PeerJ. 2022 Jan 11;10:e12809. doi: 10.7717/peerj.12809 (PMC8759353; doi:10.7717/peerj.12809)
Supplement: Supplemental Information 3 [file peerj-10-12809-s003.xlsx]

## Sheet: data_P1
region	no	coupon	c1	c2	c3	network	gender	age	education	occupation	con_use1	con_use2	V501	V502	V503	V504	V505	V506	V507	V508	V509	V510	V511	V512	V513	V514	V515	V516	V517	V518	V519	V520	V521	V522	V523	V524	V525	V526	V527	V528	V529	V530	V531	V532	V431	V432	V433	V434	V435
n	1	n1	n11	n12	n13	4	2	46	6	6	1	4	1	1	1	1	1	1	1	1	1	1	1	1	1	1	1	1	1	1	1	1	1	1	1	1	1	1	1	1	1	1	1	1	0	0	0	0	1
n	2	n2	n21	n22	n23	8	1	51	5	9	9	4	1	1	1	1	1	1	1	2	1	1	1	1	2	1	1	1	1	1	1	1	1	1	1	2	1	1	1	1	2	1	1	2	0	0	0	1	1
n	3	n3	n31	n32	n33	10	1	56	6	7	9	4	1	1	1	1	1	1	1	1	1	1	1	1	1	1	1	1	2	1	1	1	2	1	2	2	2	2	2	2	2	2	2	2	0	1	0	0	0
n	4	n11	n111	n112	n113	10	1	65	6	11	3	2	1	1	1	1	1	1	1	1	1	1	1	1	1	1	1	1	1	1	1	1	1	1	2	1	1	2	1	2	2	1	1	2	1	0	0	0	1
n	5	n12	n121	n122	n123	10	1	38	6	9	3	2	1	1	1	1	1	1	1	1	1	1	1	1	1	1	1	1	1	1	1	1	1	1	1	2	2	2	2	2	2	2	2	2	0	0	0	0	0
n	6	n21	n211	n212	n213	1000	1	64	6	11	4	1	1	2	1	1	2	2	1	1	1	2	1	1	1	2	1	1	1	2	2	2	2	2	2	2	2	2	2	2	2	2	2	2	1	0	0	1	0
n	7	n22	n221	n222	n223	4	1	59	6	7	4	1	1	1	1	1	1	1	1	2	1	1	1	1	2	1	1	1	2	1	1	2	2	1	2	1	1	2	1	2	2	2	1	2	0	0	0	1	1
n	8	n23	n231	n232	n233	5	1	60	2	3	1	4	1	1	1	1	1	1	1	1	1	1	1	1	1	1	1	1	1	1	1	1	1	1	1	1	2	2	2	2	2	2	2	2	0	0	0	0	0
n	9	n31	n311	n312	n313	5	1	65	4	1	6	4	1	1	1	1	1	1	1	1	1	1	1	1	1	1	1	1	1	1	1	1	1	1	1	1	1	1	1	1	1	1	1	1	1	0	0	0	0
n	10	n32	n321	n322	n323	26	2	61	2	3	2	3	1	1	1	1	1	1	1	1	2	1	2	2	2	1	1	2	1	1	1	1	2	2	2	2	1	1	2	2	2	2	2	2	0	0	0	0	1
n	11	n33	n331	n332	n333	10	1	52	5	6	5	4	1	1	1	1	1	1	1	1	1	1	1	1	2	1	1	1	1	1	1	1	1	1	1	1	1	1	2	2	2	2	2	2	0	0	0	0	0
n	12	n111	n1111	n1112	n1113	1	1	51	6	11	1	4	1	2	1	1	1	1	1	1	1	1	1	1	1	1	1	1	1	1	1	2	2	2	2	2	2	2	2	2	2	1	2	2	0	0	0	1	1
n	13	n112	n1121	n1122	n1123	6	2	48	4	7	1	4	1	1	1	1	1	1	1	1	1	1	1	1	1	1	1	1	1	1	1	1	1	1	1	1	1	1	2	2	2	2	2	1	0	0	0	0	0
n	14	n113	n1131	n1132	n1133	4	2	42	4	9	3	2	1	1	1	1	1	1	1	1	1	1	1	1	1	1	1	1	1	1	1	1	1	1	1	1	1	1	1	1	1	1	1	1	1	0	0	0	0
n	15	n121	n1211	n1212	n1213	5	1	38	6	9	3	2	1	1	1	1	1	1	1	2	2	2	1	1	1	1	1	1	2	2	1	2	2	2	2	2	2	2	2	2	2	2	2	2	0	0	0	0	1
n	16	n122	n1221	n1222	n1223	6	1	24	3	5	4	1	1	1	1	1	1	1	1	1	2	1	1	1	2	1	1	1	1	1	1	1	2	2	2	2	2	2	2	2	2	2	2	2	0	0	0	0	0
n	17	n211	n2111	n2112	n2113		1	40	5		9	4	1	1	1	1	1	1	1	1	1	1	1	1	1	1	1	1	1	1	1	1	1	1	1	1	1	1	2	2	2	2	2	2	1	0	0	0	1
n	18	n212	n2121	n2122	n2123	3	1	66	6	4	4	1	1	1	1	1	1	1	1	1	1	1	1	1	1	1	1	1	1	1	1	1	1	1	1	2	2	1	1	1	1	1	1	1	0	0	0	0	0
n	19	n213	n2131	n2132	n2133	50	1	62	5	1	1	4	1	1	2	1	1	1	1	1	1	1	1	1	1	1	1	1	1	1	1	1	2	2	2	2	2	2	2	2	2	2	2	2	0	0	0	1	0
n	20	n221	n2211	n2212	n2213	7	2	41	2	4	4	1	1	1	1	1	1	1	1	1	1	1	1	1	1	1	1	1	1	1	1	1	1	2	2	2	2	2	2	2	2	2	2	2	1	0	0	1	1
n	21	n222	n2221	n2222	n2223	3	1	72	6	5	4	1	1	2	1	1	1	1	1	2	1	1	1	1	2	1	1	1	1	1	1	1	1	1	2	2	2	2	1	1	2	1	2	2	1	0	0	0	0
n	22	n231	n2311	n2312	n2313	5	1	78	6	11	1	4	1	1	1	1	1	1	1	1	1	1	1	1	1	1	1	1	1	1	1	1	1	1	1	1	1	2	2	2	2	2	2	2	1	0	0	0	1
n	23	n232	n2321	n2322	n2323	20	1	47	6	9	3	2	1	1	1	1	2	2	2	1	1	1	2	1	1	1	1	1	1	1	1	1	1	1	1	1	2	1	1	1	2	2	2	2	0	0	0	0	0
n	24	n233	n2331	n2332	n2333	1	1	63	6	1	7	4	1	1	1	1	1	1	1	1	2	2	1	1	1	1	1	1	1	1	1	1	2	1	1	1	1	1	1	1	2	1	1	2	0	0	1	1	1
n	25	n321	n3211	n3212	n3213	6	1	60	2	9	2	3	1	1	1	1	1	1	1	1	1	1	1	1	1	1	1	1	1	1	1	1	1	1	1	1	1	1	1	1	1	1	1	1	0	0	0	0	1
n	26	n322	n3221	n3222	n3223	5	1	58	6	8	6	4	1	2	1	1	1	1	1	2	2	1	2	1	2	2	1	1	1	2	1	2	2	2	2	2	2	2	2	2	2	2	2	2	0	0	0	0	1
n	27	n323	n3231	n3232	n3233	10	2	47	6	1	2	3	1	1	1	1	1	1	1	1	1	1	1	1	1	1	1	1	1	1	1	1	1	1	2	2	1	2	2	2	2	2	2	2	0	0	0	0	1
n	28	n331	n3311	n3312	n3313	6	1	36	5	6	5	4	1	1	1	1	1	1	1	1	1	1	1	1	1	1	1	1	1	1	1	1	1	1	1	1	1	1	2	2	2	2	2	2	0	0	0	1	0
n	29	n332	n3321	n3322	n3323	3	1	29	5	6	5	4	1	1	1	1	1	1	1	1	1	1	1	1	1	1	1	1	1	1	1	1	2	2	2	2	2	2	2	2	2	2	2	2	0	0	0	0	0
n	30	n333	n3331	n3332	n3333	6	1	39	5	6	5	4	1	1	1	1	1	1	1	1	1	1	1	1	1	1	1	1	1	1	1	1	2	2	2	2	2	2	2	2	2	2	2	2	0	0	0	0	0
n	31	n1121	n11211	n11212	n11213	10	1	69	6	11	4	1	1	1	1	1	1	1	1	1	2	1	2	1	1	1	2	1	1	2	1	2	2	1	2	2	2	2	1	2	2	1	1	2	0	0	0	1	1
n	32	n1122	n11221	n11222	n11223	4	2	73	2	1	4	1	1	1	1	1	1	1	1	1	1	1	1	1	1	1	1	1	1	1	1	1	1	1	1	2	2	2	2	2	2	2	2	2	0	0	0	0	0
n	33	n1123	n11231	n11232	n11233	3	1	68	2	4	6	4	1	1	1	1	1	1	1	1	1	1	1	1	1	1	1	1	1	1	1	1	2	2	2	2	2	2	2	2	2	2	2	2	0	0	0	0	0
n	34	n1131	n11311	n11312	n11313	10	2	47	6	7	4	1	1	1	1	1	1	1	1	1	1	1	1	1	1	1	1	1	1	1	1	1	1	1	1	2	2	2	2	2	2	2	2	2	0	0	0	0	0
n	35	n1132	n11321	n11322	n11323	300	1	61	6	9	3	2	1	1	1	1	1	1	1	1	1	1	1	1	1	1	1	1	1	1	1	1	1	1	1	2	2	2	2	2	2	2	2	2	0	0	0	1	0
n	36	n1133	n11331	n11332	n11333	4	1	85	2	1	4	4	1	1	1	1	1	1	1	1	1	1	1	1	1	1	1	1	1	1	1	1	1	2	2	2	2	2	2	2	2	2	2	2	0	0	0	0	1
n	37	n2111	n21111	n21112	n21113		1	48	5	9	1	4	1	1	1	1	1	1	1	1	1	1	1	1	1	1	1	1	1	1	1	1	1	1	1	1	1	1	1	1	1	1	1	2	0	0	0	0	1
n	38	n2112	n21121	n21122	n21123	100	1	50	6	11	7	4	1	1	1	1	1	1	1	1	1	1	1	1	1	1	1	1	1	1	1	1	1	1	1	1	1	1	2	1	2	2	2	1	1	0	0	0	0
n	39	n2121	n21211	n21212	n21213	3	1	28	6	6	3	2	1	1	1	1	1	1	1	1	1	1	1	1	1	1	1	1	1	1	1	1	1	1	1	1	1	1	1	1	1	1	1	1	0	0	0	0	0
n	40	n2122	n21221	n21222	n21223	3	1	42	5	6	4	1	1	1	1	1	1	1	1	1	1	1	1	1	1	1	1	1	1	1	1	1	2	2	2	2	2	2	2	2	2	2	2	2	0	0	0	0	1
n	41	n2123	n21231	n21232	n21233		1	84	5	1	2	3	1	1	1	1	2	2	2	1	1	1	1	1	1	2	1	2	2	1	1	2	2	1	2	1	1	1	1	2	2	1	2	2	0	0	0	1	0
n	42	n2131	n21311	n21312	n21313	5	1	60	4	4	3	2	1	2	1	1	1	1	1	1	1	2	1	1	2	1	1	2	1	1	1	2	2	2	2	2	2	2	2	2	2	2	2	2	1	0	0	0	0
n	43	n2132	n21321	n21322	n21323	1	2	51	4	1	2	3	1	1	2	1	2	2	2	1	2	2	2	2	2	1	2	2	2	2	1	2	1	2	2	2	1	1	1	2	2	2	1	1	0	0	0	0	1
n	44	n2133	n21331	n21332	n21333	1	2	54	2	5	2	3	1	2	1	1	1	1	1	1	1	1	1	2	1	1	1	1	1	1	1	1	1	1	1	1	2	2	2	2	2	2	2	2	0	0	0	1	1
n	45	n2211	n22111	n22112	n22113	6	1	68	2	4	1	4	1	1	1	1	1	1	1	1	1	1	1	1	1	1	1	1	1	1	1	1	1	1	1	2	2	2	2	2	2	2	2	2	1	0	0	0	0
n	46	n2212	n22121	n22122	n22123	4	1	59	6	7	3	2	1	1	1	1	1	1	1	1	1	1	1	1	1	1	1	1	1	1	1	1	1	1	1	1	2	2	2	2	2	2	2	2	1	0	0	0	0
n	47	n2221	n22211	n22212	n22213	8	1	63	6	9	3	4	1	1	1	1	2	1	1	1	1	1	1	1	1	1	1	1	1	1	1	1	2	2	2	2	1	2	2	2	2	2	2	2	0	0	0	1	0
n	48	n2222	n22221	n22222	n22223	100	1	62	6	11	4	4	1	2	1	1	2	1	1	2	2	2	1	1	1	1	1	1	1	1	1	1	1	1	1	1	1	1	2	2	2	2	2	2	1	0	0	0	0
n	49	n2223	n22231	n22232	n22233	10	1	38	3	4	4	1	1	1	1	1	1	1	1	1	1	1	1	1	1	1	1	1	1	1	1	1	2	2	2	1	1	1	1	2	2	1	1	2	0	0	0	0	1
n	50	n2321	n23211	n23212	n23213	5	1	63	6	1	7	4	1	1	1	1	1	1	1	1	2	1	1	1	1	1	1	1	1	1	1	2	1	1	2	2	2	1	2	2	2	2	2	2	1	0	0	0	0
n	51	n2322	n23221	n23222	n23223	5	1	52	6	7	1	4	1	1	1	1	1	1	1	1	1	1	1	1	1	1	1	1	1	1	1	1	2	2	2	2	2	2	2	2	2	2	2	2	0	0	0	0	1
n	52	n2323	n23231	n23232	n23233	20	1	65	6	11	1	4	1	1	1	1	1	1	1	1	1	1	1	1	1	1	1	1	1	1	1	1	2	2	2	2	2	2	2	2	2	2	2	2	0	0	0	0	0
n	53	n2331	n23311	n23312	n23313	2	2	62	4	1	1	4	1	1	1	1	1	1	1	1	1	1	1	1	1	1	2	1	1	1	1	2	1	1	2	2	2	2	2	2	2	1	2	1	0	0	1	1	0
n	54	n3211	n32111	n32112	n32113	3	2	75	2	1	2	3	1	1	1	1	1	1	1	1	1	1	1	1	1	1	1	1	1	1	1	1	1	1	1	1	1	1	2	2	2	2	2	2	0	0	0	0	1
n	55	n3212	n32121	n32122	n32123	3	2	54	2	1	2	3	2	2	2	1	1	1	2	1	2	1	2	1	2	1	2	2	2	2	1	2	2	2	2	2	1	2	2	2	2	2	2	2	1	0	0	0	0
n	56	n3213	n32131	n32132	n32133	6	2	68	6	9	2	3	1	1	1	1	1	1	1	1	1	1	1	1	1	1	1	1	1	1	1	1	1	1	1	1	1	1	1	1	1	1	1	1	0	0	0	0	1
n	57	n3221	n32211	n32212	n32213	5	2	55	2	5	3	2	1	1	1	1	1	1	1	1	1	1	1	1	1	1	1	1	1	1	1	1	1	1	1	1	1	1	1	1	1	1	1	2	0	0	0	0	1
n	58	n3222	n32221	n32222	n32223	4	1	62	2	1	2	3	1	1	1	1	1	1	1	1	1	1	1	1	1	1	1	1	1	1	1	1	1	1	2	2	2	2	2	2	2	2	2	2	1	0	0	0	1
n	59	n3223	n32231	n32232	n32233	1	2	56	2	5	2	3	1	1	1	1	1	1	1	1	1	1	1	1	1	1	1	1	1	1	1	1	1	1	1	1	1	1	1	2	1	2	1	2	0	0	0	1	0
n	60	n3231	n32311	n32312	n32313	2	2	53	2	1	2	2	1	1	1	1	1	1	1	1	1	1	1	1	1	1	1	1	1	1	1	1	1	1	1	1	2	1	1	1	1	1	1	2	0	0	0	0	1
n	61	n3232	n32321	n32322	n32323	2	2	67	2	5	4	4	1	1	1	1	2	1	1	1	1	1	1	2	1	1	1	1	1	1	1	1	2	2	2	2	2	2	2	2	2	2	2	2	0	0	0	0	1
n	62	n3311	n33111	n33112	n33113	2	1	44	5	6	5	4	1	1	1	1	1	1	1	1	1	1	1	1	1	1	1	1	1	1	1	1	1	1	1	1	1	1	2	2	2	2	2	2	0	0	0	0	1
n	63	n3321	n33211	n33212	n33213	4	1	38	6	6	5	4	1	1	1	1	1	1	1	1	1	1	1	1	1	1	1	1	1	1	1	1	2	2	2	2	2	2	2	2	2	2	2	2	0	0	0	0	0
n	64	n3322	n33221	n33222	n33223		1	48	2	6	5	4	1	1	1	1	1	1	1	1	1	1	1	1	1	1	1	1	1	1	1	1	2	2	2	2	2	2	2	2	2	2	2	2	0	0	0	0	0
n	65	n3331	n33311	n33312	n33313	2	1	35	5	6	5	4	1	1	1	1	1	1	1	1	1	1	1	1	1	1	1	1	1	1	1	1	2	2	2	2	2	2	2	2	2	2	2	2	0	0	0	0	0
n	66	n11211	n112111	n112112	n112113	1	1	48	2	9	4	1	1	1	1	1	1	1	1	1	1	1	1	1	1	1	1	1	1	1	1	1	1	1	2	2	2	2	2	2	2	2	2	2	0	0	0	0	1
n	67	n11221	n112211	n112212	n112213	2	1	56	3	9	1	4	1	1	1	1	1	1	1	1	1	1	1	1	1	1	1	1	1	1	1	1	1	1	1	2	1	2	2	2	2	2	2	2	0	0	0	0	0
n	68	n11311	n113111	n113112	n113113	10	2	93	2	4	3	2	1	1	1	1	1	1	1	1	1	1	1	1	1	1	1	1	1	1	1	1	1	1	2	2	2	2	2	2	2	2	2	2	0	0	0	1	1
n	69	n11312	n113121	n113122	n113123	5	1	60	3	5	4	1	1	2	1	1	2	2	2	2	2	2	2	2	2	2	2	1	2	1	1	1	2	2	2	2	2	2	2	2	2	2	2	2	0	0	0	0	1
n	70	n11313	n113131	n113132	n113133	6	1	60	6	11	3	2	1	1	1	1	1	1	1	1	1	1	1	1	1	1	1	1	1	1	1	1	2	2	2	2	2	2	2	2	2	2	2	2	0	0	0	0	0
n	71	n11331	n113311	n113312	n113313	4	1	47	4	6	4	4	1	1	1	1	1	1	1	1	1	1	1	1	1	1	1	1	1	1	1	1	2	2	2	2	2	2	2	2	2	2	2	2	0	0	0	0	1
n	72	n11332	n113321	n113322	n113323	3	1	78	3	1	1	4	1	1	1	1	1	1	1	1	1	1	1	1	1	1	1	1	1	1	1	1	2	2	2	2	2	2	2	2	2	2	2	2	0	0	0	0	1
n	73	n21121	n211211	n211212	n211213	5	1	34	6	4	3	4	1	1	1	1	1	1	1	1	1	1	1	1	1	1	1	1	1	1	1	1	1	1	1	1	1	1	1	1	2	2	2	2	0	0	0	1	0
n	74	n21211	n212111	n212112	n212113	3	2	66	4	4	1	4	1	1	1	1	1	1	1	1	1	1	1	1	1	1	1	1	1	1	1	1	2	2	2	2	2	2	2	2	2	2	2	2	0	0	0	0	1
n	75	n21221	n212211	n212212	n212213	3	1	40	6	6	4	1	1	1	1	1	1	1	1	1	1	1	1	1	1	1	1	1	1	1	1	1	1	1	2	2	2	2	2	2	2	2	2	2	0	0	0	0	0
n	76	n21222	n212221	n212222	n212223	4	1	44	5	6	4	1	1	1	1	1	1	1	1	1	1	1	1	1	1	1	1	1	1	1	1	1	1	1	1	1	2	2	2	2	2	2	2	2	0	0	0	0	0
n	77	n21331	n213311	n213312	n213313	1	1	60	2	4	1	4	1	1	1	1	1	1	1	1	1	1	1	1	1	1	1	1	1	1	1	1	2	2	2	2	2	2	2	1	2	2	2	2	0	0	0	0	1
n	78	n22211	n222111	n222112	n222113	100	2	39	6	9	4	4	1	1	1	1	1	1	1	1	1	1	1	1	1	1	1	1	1	1	1	1	1	1	2	2	2	2	2	2	2	2	2	2	1	0	0	0	1
n	79	n22221	n222211	n222212	n222213	10	1	58	6	9	3	2	1	1	1	1	2	1	1	1	1	1	1	1	1	1	1	1	1	1	1	1	1	1	1	1	1	1	1	1	1	1	1	1	1	0	0	0	0
n	80	n22222	n222221	n222222	n222223	5	1	67	6	4	1	4	1	2	1	1	2	1	1	1	1	1	1	1	1	1	1	1	1	1	1	1	1	1	1	1	1	1	1	1	1	1	1	1	0	0	0	0	1
n	81	n22231	n222311	n222312	n222313	20	1	35	6	9	4	1	1	1	1	1	1	1	1	1	1	1	1	1	1	1	1	1	1	1	1	1	1	1	1	1	1	1	1	1	1	1	1	1	1	0	0	0	0
n	82	n23211	n232111	n232112	n232113	1	1	67	6	1	1	4	2	2	2	1	2	1	1	2	2	1	1	2	2	2	2	2	1	1	1	2	2	1	2	2	2	2	2	2	2	2	2	2	0	0	0	0	1
n	83	n23221	n232211	n232212	n232213	3	1	55	6	5	1	4	1	2	1	1	1	1	1	1	1	1	1	1	2	2	1	1	1	2	1	1	2	2	2	2	1	2	2	2	2	2	2	2	0	0	0	1	0
n	84	n23222	n232221	n232222	n232223	1	1	63	4	6	4	1	1	1	1	1	1	1	1	1	2	2	1	1	1	1	2	1	2	2	1	2	1	2	2	1	1	2	1	2	2	1	1	2	0	0	0	0	1
n	85	n23231	n232311	n232312	n232313	6	1	54	6	7	2	3	1	1	1	1	1	1	1	1	1	1	1	1	1	1	1	1	1	1	1	1	1	1	1	1	1	1	1	1	1	1	1	1	0	0	0	0	0
n	86	n23232	n232321	n232322	n232323	6	2	49	4	3	6	4	1	1	1	1	1	1	1	1	1	1	1	1	1	1	1	1	1	1	1	1	1	2	1	1	1	1	1	1	1	1	1	1	0	0	0	0	0
n	87	n23233	n232331	n232332	n232333	4	1	68	2	3	1	4	1	1	1	1	1	1	1	1	1	1	1	1	1	1	1	1	1	1	1	1	2	2	2	2	2	2	2	2	2	2	2	2	0	0	0	0	1
n	88	n23311	n233111	n233112	n233113	1	2	61	4	1	2	3	1	1	1	1	2	1	1	1	2	1	2	2	2	1	1	1	1	2	1	1	1	1	1	2	1	2	2	2	2	2	2	2	0	0	0	0	1
n	89	n32111	n321111	n321112	n321113	6	1	75	2	1	2	3	1	1	1	1	1	1	1	1	1	1	1	1	1	1	1	1	1	1	1	1	1	1	1	1	1	1	2	2	2	2	2	2	0	0	0	0	1
n	90	n32131	n321311	n321312	n321313		2	54	2	3	2	3	1	1	1	1	1	1	1	1	1	1	1	1	1	1	1	1	1	1	1	2	1	2	2	2	2	2	2	2	2	2	2	2	0	0	0	0	0
n	91	n32132	n321321	n321322	n321323	1	2	65	2	1	2	3	2	2	2	1	2	2	2	1	2	1	2	2	2	1	2	2	2	2	2	2	2	2	2	2	2	2	2	2	2	2	2	2	0	0	0	0	1
n	92	n32221	n322211	n322212	n322213		1	62	2	3	2	3	1	1	1	1	2	1	1	1	1	1	2	2	2	1	1	1	1	1	1	2	1	1	1	2	1	2	2	2	2	2	2	2	0	0	0	0	0
n	93	n32222	n322221	n322222	n322223	1	1	63	2	4	2	3	1	1	1	1	1	1	1	1	1	1	1	1	1	1	1	1	1	1	1	1	2	2	2	2	1	1	2	1	2	2	2	2	0	0	0	0	1
n	94	n32231	n322311	n322312	n322313	1	1	63	2	6	2	3	1	1	1	1	1	1	1	1	1	1	1	1	1	1	1	1	1	1	1	1	1	1	2	2	1	1	1	2	2	1	1	2	0	0	0	0	1
n	95	n33111	n331111	n331112	n331113	3	1	52	4	3	5	4	1	1	1	1	1	1	1	1	1	1	1	1	2	1	1	1	2	1	2	2	2	2	2	1	1	1	1	1	1	2	2	1	0	0	0	0	1
n	96	n33112	n331121	n331122	n331123	4	1	53	3	3	5	4	1	1	1	1	1	1	2	2	2	2	1	2	2	1	1	1	2	1	2	1	2	1	1	1	1	1	2	2	2	2	2	2	0	0	0	0	1
n	97	n113111	n1131111	n1131112	n1131113	6	1	72	2	1	2	3	1	1	1	1	1	1	1	1	1	1	1	1	1	1	1	1	1	1	1	1	1	1	1	2	2	2	2	2	2	2	2	2	0	0	0	0	1
n	98	n113112	n1131121	n1131122	n1131123	2	1	96	2	1	1	4	1	1	1	1	1	1	1	1	2	1	1	1	1	1	1	1	1	1	1	1	2	2	2	2	2	2	2	2	2	2	2	2	0	0	0	0	0
n	99	n113113	n1131131	n1131132	n1131133	1000	2	47	4	5	4	1	1	1	1	1	1	1	1	1	1	1	1	1	1	1	1	1	1	1	1	1	2	2	2	2	1	2	2	2	2	2	2	2	0	0	0	0	0
n	100	n113121	n1131211	n1131212	n1131213	4	1	45	3	4	4	1	1	2	1	1	2	1	2	2	2	2	2	2	2	2	2	1	2	1	2	2	2	2	2	2	2	1	1	1	1	1	1	1	0	0	0	0	1
n	101	n113122	n1131221	n1131222	n1131223	3	2	54	3	5	4	1	1	2	1	1	2	1	2	2	1	1	2	1	1	1	2	2	1	2	1	1	1	2	2	2	2	2	2	2	2	2	2	2	0	0	0	0	0
n	102	n113123	n1131231	n1131232	n1131233	3	1	41	5	3	3	2	1	1	1	1	1	1	1	1	1	1	1	1	1	1	1	1	1	1	1	1	2	2	2	2	2	2	2	2	2	2	2	2	0	0	0	0	0
n	103	n113131	n1131311	n1131312	n1131313	40	2	52	6	9	8	4	1	1	1	1	1	1	1	1	2	1	1	1	2	1	1	1	1	1	1	1	1	2	2	2	1	2	2	2	2	2	2	2	1	0	0	0	0
n	104	n113132	n1131321	n1131322	n1131323	1	1	60	2	4	8	4	1	1	1	1	1	1	1	1	2	1	1	1	1	1	2	1	1	1	2	1	2	2	2	2	1	2	1	1	1	2	2	2	0	0	0	0	1
n	105	n113133	n1131331	n1131332	n1131333	4	2	79	3	1	4	1	1	2	1	1	1	2	2	1	2	1	1	1	1	1	2	2	1	2	1	2	2	1	2	2	2	2	2	2	2	2	2	2	0	0	0	0	1
n	106	n212211	n2122111	n2122112	n2122113	4	2	64	2	4	2	3	1	1	1	1	1	1	1	1	1	1	1	1	1	1	1	1	1	1	1	1	1	1	2	2	2	2	2	2	2	2	2	2	0	0	0	0	1
n	107	n232311	n2323111	n2323112	n2323113	6	2	44	4	3	4	4	1	1	1	1	1	1	1	1	1	1	1	1	1	1	1	1	1	1	1	1	1	1	1	1	1	1	1	1	1	1	1	1	0	0	0	0	1
n	108	n232312	n2323121	n2323122	n2323123	6	2	51	4	4	1	4	1	1	1	1	1	1	1	1	1	1	1	1	1	1	1	1	1	1	1	1	1	1	2	2	2	2	2	2	2	2	2	2	0	0	0	0	0
n	109	n321321	n3213211	n3213212	n3213213		2	69	2	3	2	3	2	2	1	1	1	1	1	1	2	1	2	2	2	2	2	2	2	2	1	2	2	2	2	2	2	2	2	2	2	2	2	2	0	0	0	0	0
n	110	n322221	n3222211	n3222212	n3222213	3	2	69	2	9	2	3	1	1	1	1	2	2	1	1	2	1	1	1	1	1	2	2	1	1	1	1	2	2	2	1	1	1	1	1	2	2	1	1	0	0	0	0	0
n	111	n322311	n3223111	n3223112	n3223113	10	1	58	1	4	2	3	1	1	1	1	1	1	1	1	1	1	1	1	1	1	1	1	1	1	1	1	1	1	2	2	2	2	2	2	2	2	2	2	0	0	0	0	1
n	112	n1131131	n11311311	n11311312	n11311313	15	1	64	2	3	1	4	1	1	1	1	1	1	1	1	1	1	1	1	1	1	1	1	1	1	1	1	2	2	2	2	1	2	2	2	2	2	2	2	0	0	0	0	0
n	113	n1131132	n11311321	n11311322	n11311323	10	2	43	4	5	4	1	1	1	1	1	1	1	1	1	2	1	1	2	2	1	1	1	1	1	1	1	2	2	2	2	2	2	2	2	2	2	2	2	0	0	0	0	0
n	114	n1131133	n11311331	n11311332	n11311333	2	1	42	4	5	4	1	1	1	1	1	1	1	1	1	1	1	1	1	2	1	1	1	1	2	1	2	1	2	2	2	2	1	1	2	2	2	2	2	0	0	0	0	0
n	115	n1131211	n11312111	n11312112	n11312113	2	2	65	2	3	4	1	1	1	1	1	1	1	1	1	1	1	1	1	1	1	1	1	1	1	1	1	1	1	1	2	2	2	2	2	2	2	2	2	0	0	0	0	0
n	116	n1131221	n11312211	n11312212	n11312213	3	2	60	2	5	4	1	1	2	1	1	2	2	2	1	1	1	1	1	1	1	1	1	1	1	1	1	1	1	1	1	1	1	1	1	1	1	1	1	0	0	0	0	0
n	117	n2122111	n21221111	n21221112	n21221113	5	1	37	5	6	6	4	1	1	1	1	1	1	1	1	1	1	1	1	1	1	1	1	1	1	1	1	2	2	2	2	2	2	2	2	2	2	2	2	0	0	0	0	0
n	118	n2122112	n21221121	n21221122	n21221123	3	2	50	6	6	6	4	1	1	1	1	1	1	1	1	1	1	1	1	1	1	1	1	1	1	1	1	1	1	1	2	2	2	2	2	2	2	2	2	0	0	0	0	1
n	119	n2122113	n21221131	n21221132	n21221133	3	1	48	5	6	4	1	1	1	1	1	1	1	1	1	1	1	1	1	1	1	1	1	1	1	1	1	1	2	2	2	2	2	2	2	2	2	2	2	0	0	0	0	0
n	120	n3222211	n32222111	n32222112	n32222113		2	63	1	1	2	3	1	1	1	1	1	1	1	1	2	1	1	1	1	1	1	1	1	1	1	1	1	1	1	1	1	1	1	1	1	1	2	1	0	0	0	0	0
n	121	n11311311	n113113111	n113113112	n113113113	10	1	60	6	4	1	4	2	1	2	1	1	1	1	2	2	2	2	1	2	2	2	2	2	2	1	2	2	1	2	1	2	2	1	2	2	2	2	2	0	0	0	1	0
n	122	n21221111	n212211111	n212211112	n212211113	4	1	66	3	4	4	4	1	1	1	1	1	1	1	1	1	1	1	1	1	1	1	1	1	1	1	1	1	2	2	2	2	2	2	2	2	2	2	2	0	0	0	0	0
n	123	n21221112	n212211121	n212211122	n212211123	4	2	54	3	3	3	4	1	1	1	1	1	1	1	1	1	1	1	1	1	1	1	1	1	1	1	1	2	2	2	2	2	2	2	2	2	2	2	2	0	0	0	0	0
n	124	n21221121	n212211211	n212211212	n212211213	4	1	51	5	3	6	4	1	1	1	1	1	1	1	1	1	1	1	1	1	1	1	1	1	1	1	2	2	2	2	1	2	2	2	2	1	2	2	2	0	0	0	0	0
n	125	n21221122	n212211221	n212211222	n212211223	3	1	52	3	3	4	1	1	1	1	1	1	1	1	1	1	1	1	1	1	1	1	1	1	1	1	1	1	1	2	2	2	2	2	2	2	2	2	2	0	0	0	0	0
c	126	c1	c11	c12	c13	7	1	37	3	3	3	2	1	1	1	1	1	1	1	2	2	2	2	1	1	2	1	2	2	1	1	2	2	2	1	2	1	2	1	2	1	1	2	2	0	0	0	1	1
c	127	c2	c21	c22	c23	3	1	45	4	9	3	2	2	1	1	1	1	1	1	2	1	2	2	2	1	1	1	1	2	2	1	2	1	1	1	2	1	2	1	2	1	1	1	2	0	0	0	0	1
c	128	c3	c31	c32	c33	7	2	69	2	1	4	1	1	1	1	1	1	1	1	1	1	1	1	1	1	1	1	1	1	1	1	1	2	2	2	2	1	2	2	2	2	2	2	2	0	0	0	0	1
c	129	c4	c41	c42	c43	138	1	58	3	9	1	4	1	1	1	1	1	1		1	1	1	1	1				1	1	1		1			2		1	2							1	0	0	0	0
c	130	c11	c111	c112	c113	4	2	60	3	9	1	4	1	2	1	1	1	1	1	1	2	2	2	2	2	2	2	1	2	1	1	1	1	2	1	1	2	1	1	1	2	2	2	1	0	0	0	0	0
c	131	c12	c121	c122	c123	4	1	38	5	5	3	2	1	2	1	1	1	1	1	1	1	1	1	1	1	1	1	1	1	1	1	2	1	2	2	2	1	2	2	2	2	2	2	2	0	0	0	1	1
c	132	c13	c131	c132	c133	5	1	40	6	6	4	1	1	2	2	1	1	1	1	1	1	2	1	2	2	2	2	1	1	1	1	1	1	1	1	2	2	1	1	1	1	1	1	1	0	0	0	1	1
c	133	c21	c211	c212	c213	4	1	34	4	6	3	2	1	2	1	1	2	1	1	1	2	2	2	2	1	2	2	2	1	1	1	2	2	1	1	1	2	1	1	2	2	2	2	2	0	0	0	0	1
c	134	c22	c221	c222	c223	5	2	23	5	6	3	2	1	1	1	1	2	1	2	1	1	1	1	2	1	1	1	1	2	2	1	1	2	2	2	1	1	2	1	1	1	2	1	1	0	0	0	1	1
c	135	c23	c231	c232	c233	8	2	34	5	6	3	2	1	1	2	1	1	1	1	1	1	1	2	1	1	1	1	1	1	1	1	2	2	2	2		1	1	1	2	2	2	2	2	0	0	0	1	1
c	136	c31	c311	c312	c313	6	2	63	3	4	1	4	1	1	1	1	1	1	1	1	1	1	1	1	1	1	1	1	1	1	1	1	1	1	1	1	1	1	2	2	2	1	2	2	0	0	0	0	1
c	137	c32	c321	c322	c323	6	2	59	2	1	7	4	1	1	1	1	1	1	1	1	1	1	1	1	1	1	1	1	1	1	1	1	1	2	2	2	1	1	2	2	2	1	2	2	0	0	0	0	1
c	138	c33	c331	c332	c333	5	2	73	2	1	1	4	1	1	1	1	1	1	1	1	1	1	1	1	1	1	1	1		1	1	1	1	2	2	1	1	2	2	2	2	2	2	2	0	0	0	0	1
c	139	c41	c411	c412	c413	138	1	53	2	4	4	1	1	1	1	1	1	1	1	1	1	1	1	1	2	1	1	1	1	1	1	1	1	2	2	2	2	2	2	2	2	2	2	2	1	0	0	0	0
c	140	c42	c421	c422	c423	137	2	59	2	1	8	4	1	1	1	1	1	1	1	1	1	1	1	1	1	1	1	1	1	1	1	1	2	2	2	2	2	2	2	2	2	2	2	2	0	0	0	0	1
c	141	c43	c431	c432	c433	138	2	50	2	3	4	1	1	1	1	1	1	1	1	1	1	1	1	1	1	1	1	1	1	1	1	1	2	2	2	2	2	2	2	2	2	2	2	2	0	0	0	0	1
c	142	c111	c1111	c1112	c1113	2	1	61	5	11	4	4	1	1	1	1	2	1	2	2	2	2	2	2	1	2	2	2	1	1	1	2	2	2	1	1	2	1	1	1	2	2	2	2	0	0	0	0	1
c	143	c112	c1121	c1122	c1123	3	1	37	2	3	3	2	1	1	1	1	1	1	2	2	2	2	2	1	1	2	1	2	1	2	1	1	1	2	2	1	2	1	1	1	1	1	2	2	0	0	0	1	1
c	144	c113	c1131	c1132	c1133	6	2	31	6	6	3	2	2	2	1	1	1	1	1	1	2	2	1	2	1	2	1	1	2	2	1	2	1	1	1	2	1	1	1	2	2	1	1	1	0	0	0	1	1
c	145	c121	c1211	c1212	c1213	1	1	46	4	5	3	2	1	2	1	1	2	1	1	1	1	1	2	1	1	1	1	1	1	1	1	1	1	2	2	2	1	2	2	2	1	2	2	2	0	0	0	1	1
c	146	c122	c1221	c1222	c1223	3	2	38	6	6	3	2	2	2	1	1	1	1	1	1	2	2	1	2	2	2	1	2	1	2	1	2	2	1	1	1	1	2	2	2	2	1	1	2	0	0	0	1	1
c	147	c123	c1231	c1232	c1233	1	1	40	5	3	3	2	1	1	1	1	1	1		1	1	2	1	1	1	1	1	1	1	1	1	1	2	2	2	2	1	2	2	2	2	2	2	2	0	0	0	1	1
c	148	c131	c1311	c1312	c1313	6	1	38	5	5	4	1	1	2	1	1	2	1	1	1	1	1	2	1	2	1	1	1	1	1	1	1	2	2	1	2	2	2	2	2	1	2	2	2	0	0	0	1	0
c	149	c132	c1321	c1322	c1323	3	2	31	6	6	1	4	1	2	1	1	1	2	1	1	2	1	1	1	1	1	1	1	1	2	1	1	1	1	1	2	1	2	1	2	2	2	2	2	0	0	0	1	1
c	150	c133	c1331	c1332	c1333	4	1	34	3	6	3	2	1	1	2	1	2	1	1	1	1	1	2	2	2	1	2	1	2	2	1	2	1	1	1	1	1	1	1	1	1	1	1	2	0	0	0	1	1
c	151	c211	c2111	c2112	c2113	4	2	57	2	4	2	3	1	1	2	1	1	1	1	1	1	2	1	2	1	1	1	1	2	1	1	1	2	1	1	1	1	1	2	1	1	1	1	1	0	0	0	0	1
c	152	c212	c2121	c2122	c2123	8	1	58	2	5	1	4	1	1	1	1	2	1	1	1	2	2	2	2	1	2	1	1	1	2	1	1	2	1	1	2	2	1	2	2	2	1	1	1	0	0	0	0	1
c	153	c213	c2131	c2132	c2133	5	1	29	3	3	3	2	1	1	1	1	1	1	1	2	2	2	2	2	1	2	1	1	1	1	1	2	2	1	1	2	1	2	1	2	2	2	2	2	0	0	0	0	1
c	154	c221	c2211	c2212	c2213	3	2	39	4	6	3	2	1	1	1	1	2	1	2	1	1	1	2	1	1	2	1	1	1	2	2	1	1	2	1	1	1	2	2	2	2	2	1	2	0	0	0	0	1
c	155	c222	c2221	c2222	c2223	4	1	43	4	5	3	2	1	1	1	1	2	2	2	1	1	1	2	1	1	2	1	1	1	1	2	2	2	1	1	2	1	2	1	2	1	1	1	2	0	0	0	0	1
c	156	c223	c2231	c2232	c2233	3	2	44	5	6	4	1	1	2	2	1	2	1	1	1	1	2	1	2	1	1	1	1	1	2	1	2	1	2	2	2	1	2	1	2	1	1	1	2	0	0	0	0	1
c	157	c231	c2311	c2312	c2313	7	1	57	4	9	1	4	1	2	1	1	1	2	2	1	1	1	1	1	1	1	1	1	1	1	1	1	2	2	2	2	2	2	2	2	1	2	2	2	0	0	0	1	1
c	158	c232	c2321	c2322	c2323	3	1	47	4	3	3	2	1	1	2	1	1	1	1	1	1	1	2	1	1	1	1	1	1	2	1	2	2	2	2	2	2	2	2	2	2	2	2	2	0	0	0	1	1
c	159	c233	c2331	c2332	c2333	4	2	34	5	6	3	2	1	2	1	1	2	1	2	1	1	1	2	1	1	1	1	1	2	1	1	1	1	2	1	2	2	2	1	2	1	2	2	2	0	0	0	1	1
c	160	c311	c3111	c3112	c3113	7	2	21	5	1	10	4	1	1	1	1	1	1	1	1	1	1	1	1	1	1	1	1	1	1	1	1	1	1	2	1		2	2	2	2	2	2	2	0	0	0	0	1
c	161	c312	c3121	c3122	c3123	7	1	69	3	1	4	1	1	1	1	1	1	1	1	1	1	1	1	1	1	1	1	1	1	1	1	1	2	2	2	2	2	2	2	2	2	2	2	2	0	0	0	0	1
c	162	c321	c3211	c3212	c3213	5	2	27	6	2	3	2	1	1	1	1	1	1	1	1	1	1	1	1	1	1	1	1	1	1	1	1	1	2	2	2	2	2	2	2	2	2	2	2	1	0	0	0	0
c	163	c331	c3311	c3312	c3313	4	1	64	3	4	1	4	1	1	1	1	1	1	1	1	1	1	1	1	1	1	1	1	1	1	1	1	1	2	2	2	1	2	2	2	2	2	2	2	0	0	0	0	1
c	164	c332	c3321	c3322	c3323	6	2	52	3	11	4	1	1	1	1	1	1	1	1	1	1	1	1	1	1	1	1	1	1	1	1	1	2	2	2	2	2	2	2	2	2	2	2	2	1	0	0	0	0
c	165	c333	c3331	c3332	c3333	2	2	60	2	1	4	1	1	1	1	1	1	1	1	1	1	1	1	1	1	1	1	1	1	1	1	1	1	2	2	2	2	2	2	2	2	2	2	2	0	0	0	0	1
c	166	c411	c4111	c4112	c4113	138	2	61	2	3	3	2	1	1	1	1	1	1	1	1	1	1	1	1	1	1	1	1	1	1	1	1	2	2	2	2	2	2	2	2	2	2	2	2	1	0	0	1	0
c	167	c412	c4121	c4122	c4123	138	1	60	2	4	3	2	1	1	1	1	1	1	2	1	1	1	1	1		1	1	1	1	1	1	1	1		2	2	1	2	2	2	2	2	2	2	1	0	0	0	0
c	168	c413	c4131	c4132	c4133	138	2	56	2	1	1	4	1	1	1	1	1	1	1	1	1	1	1	1	2	1	1	1	1	1	1	1	1	2	2	2	2	2	2	2	2	2	2	2	1	0	0	0	0
c	169	c421	c4211	c4212	c4213	137	1	57	6	9	1	4	1	1	1	1	1	1	1	2			1	1	2			1	1		1		2		2	2	2	2			2	2	2		1	0	0	0	0
c	170	c422	c4221	c4222	c4223	137	2	55	4	9	3	2	1	1	1	1	1	1	1	1	1	1	1	1	1	1	1	1	1	1	1	1	2	2	2	2	2	2	2	2	2	2	2	2	1	0	0	0	0
c	171	c423	c4231	c4232	c4233	138	2	56	2	1	4	1	1	1	1	1	1	1	1	1	1	1	1	1	2	1	1	1	1	1	1	1	1	2	2	2	1	2	2	2	2	2	2	2	1	0	0	0	0
c	172	c431	c4311	c4312	c4313	40	1	67	5	9	1	4	1	1	1	1	1	2	2	1	2	2	1	1	2	2	1	1	1	1	2	1	2	1	2	2	2	2	2	2	2	1	2	2	1	0	0	0	0
c	173	c432	c4321	c4322	c4323	15	2	50	5	5	2	3	1	1	1	1	1	1	1	1	1	1	1	1	1	1	1	1	1	1	1	1	2	2	2	2	2	2	2	2	2	2	2	2	1	0	0	0	0
c	174	c433	c4331	c4332	c4333	10	2	63	2	1	1	4	1	1	1	1	1	1	1	1	1	1	1	1	1	1	1	1	1	1	1	1	2	2	2	2	2	2	2	2	2	2	2	2	1	0	0	0	0
c	175	c1111	c11111	c11112	c11113	5	2	53	5	3	3	2	2	1	1	1	2	1	1	1	2	2	1	2	1	2	1	1	1	1	1	1	1	1	1	1	2	1	2	1	2	2	2	2	0	0	0	1	1
c	176	c1112	c11121	c11122	c11123	3	1	49	5	9	1	4	1	1	1	1	1	2	1	1	1	1	2	1	2	2	2	1	1	1	1	1	2	2	2	2	2	2	2	2	2	2	2	2	1	0	0	0	1
c	177	c1131	c11311	c11312	c11313	4	2	52	3	5	1	4	1	1	1	1	1	1	2	1	2	1	2	1	1	1	2	1	1	1	2	2	2	2	2	1	1	1	2	1	2	2	1	1	0	0	0	0	1
c	178	c1132	c11321	c11322	c11323	3	2	56	3	9	1	4	1	1	1	1	2	1	1	1	2	2	2	2	1	1	2	1	1	2	1	1	1	1	1	1	2	1	2	1	2	1	2	1	0	0	0	0	0
c	179	c1133	c11331	c11332	c11333	2	1	54	2	4	4	1	2	2	1	1	2	1	1	1	2	2	2	1	1	2	1	1	2	1	1	2	1	1	1	2	2	1	1	1	2	2	1	1	0	0	0	0	1
c	180	c1221	c12211	c12212	c12213	1	2	48	5	9	1	4	1	2	2	1	1	2	1	1	2	1	1	1	1	2	1	2	1	1	1	1	2	1	2	2	2	2		2	1	2	2	2	0	0	0	1	1
c	181	c1222	c12221	c12222	c12223	3	1	46	5	6	3	2	2	2	2	1	1	1	1	1	2	2	2	2	2	2	2	2	1	2	1	2	1	2	2	2	1	2	2	2	2	2	2	2	0	0	0	0	1
c	182	c1223	c12231	c12232	c12233	2	1	56	5	9	3	2	1	2	1	1	1	1	2	1	2	2	2	2	2	2	2	2	1	2	2	2	2	2	2	2	2	1	2	2	2	2	1	2	0	0	0	1	1
c	183	c1311	c13111	c13112	c13113	2	1	41	5	6	3	2	1	1	1	1	2	1	1	1	2	1	1	1	1	1	1	1	1	1	1	1	2	2	2	2	2	2	2	2	2	2	2	2	0	0	0	1	1
c	184	c1312	c13121	c13122	c13123	4	1	38	5	9	3	2	2	2	1	1	1	2	2	1	1	1	1	1	1	1	2	1	1	1	1		1	1	2	1	2	2	2	2	2	2	2	2	0	0	0	1	1
c	185	c1313	c13131	c13132	c13133	1	1	40	3	6	1	4	1	2	1	1	2	1	1	1	1	1	2	1	1	1	1	1	2	1	1	1	2	2	1	1	2	2	1	2	2	1	1	2	0	0	0	0	1
c	186	c1321	c13211	c13212	c13213	2	2	69	2	1	4	1	2	1	1	1	1	2	2	1	1	1	2	1	1	1	1	1	1	2	1	1	1	2	2	2	2	2	1	2	1	2	2	2	0	0	0	0	0
c	187	c1322	c13221	c13222	c13223	2	2	30	6	9	4	1	1	1	1	1	1	2	1	1	1	1	2	1	1	1	1	1	1	1	2	2	2	2	2	2	1	2	2	2	1	2	2	2	0	0	0	1	1
c	188	c1323	c13231	c13232	c13233	4	1	34	6	6	3	2	1	1	2	1	1	1	1	1	1	1	2	1	1	1	1	1	2	1	1	2	2	2	2	2	2	2	2	2	2	1	2	2	0	0	0	1	1
c	189	c1331	c13311	c13312	c13313	4	1	29	3	6	10	4	1	2	2	1	1	2	1	1	2	2	2	2	2	2	2	2	1	2	1	2	1	1	1	1	1	1	1	2	2	1	1	2	0	0	0	1	1
c	190	c1332	c13321	c13322	c13323	1	2	26	6	8	4	1	1	1	1	1	1	1	1	1	1	1	1	1	1	1	1	1	1	1	1	1	1	1	2	2	2	2	2	1	2	2	2	1	0	0	0	1	1
c	191	c1333	c13331	c13332	c13333	2	1	38	5	5	4	1	1	1	1	1	1	1	2	1	1	1	2	1	1	1	1	1	2	1	1	1	2	2	1	2	2	2	1	2	2	2	2	2	0	0	0	1	1
c	192	c2111	c21111	c21112	c21113	4	2	52	2	4	1	4	2	1	1	1	2	1	1	1	2	1	1	2	1	1	1	1	1	2	1	1	1	2	1	1	2	1	1	1	2	2	2	2	0	0	0	1	1
c	193	c2112	c21121	c21122	c21123	4	1	28	4	6	3	2	2	1	1	1	2	1	2	1	2	2	2	2	1	1	2	1	1	1	1	2	1	2	1	2	2	1	2	1	2	2	2	2	0	0	0	1	1
c	194	c2113	c21131	c21132	c21133	5	1	33	4	6	3	2	2	1	1	1	1	1	2	1	2	1	2	1	2	2	1	1	1	2	1	1	1	1	2	2	1	2	1	2	2	2	2	2	0	0	0	1	1
c	195	c2121	c21211	c21212	c21213	3	2	55	2	5	1	4	1	2	1	1	1	1	1	1	2	1	2	2	2	2	2	1	1	1	1	2	1	1	1	2	1	1	2	1	1	1	2	1	0	0	0	0	1
c	196	c2131	c21311	c21312	c21313	3	2	51	6	6	3	2	2	1	1	1	2	1	1	1	1	1	1	2	1	1	1	1	1	1	1	2	2	2	2	1	2	1	1	1	2	2	1	2	0	0	0	0	1
c	197	c2132	c21321	c21322	c21323	6	2	60	2	9	1	4	1	2	1	1	1	1	1	1	1	2	2	2	1	1	2	1	1	1	1	2	1	2	1	1	2	1	2	1	1	1	1	2	0	0	0	0	1
c	198	c2211	c22111	c22112	c22113	3	1	54	5	4	4	1	1	2	1	1	2	2	2	1	1	1	2	1	1	1	1	2	1	1	1	1	2	2	2	2	1	2	1	2	1	1	1	2	0	0	0	0	1
c	199	c2212	c22121	c22122	c22123	2	1	45	2	3	1	4	2	2	1	1	1	1	2	1	1	1	1	1	1	1	1	1	2	1	1	1	2	2	2	2	2	1	2	2	1	2	2	2	0	0	0	0	1
c	200	c2213	c22131	c22132	c22133	3	2	44	6	6	1	4	2	1	1	1	2	2	2	1	2	1	2	1	2	1	2	1	1	1	2	1	1	1	2	1	1	2	2	2	1	2	2	2	0	0	0	0	1
c	201	c2221	c22211	c22212	c22213	1	1	44	5	4	4	1	1	1	1	1	2	1	2	1	2	1	2	1	1	1	1	1	2	1	1	1	2	1	2	2	1	2	2	2	1	2	1	2	0	0	0	1	1
c	202	c2222	c22221	c22222	c22223	1	1	55	4	5	4	1	1	2	1	1	2	2	1	1	2	1	1	1	1	1	1	2	1	1	1	2	1	1	1	2	1	2	1	2	1	2	2	2	0	0	0	1	1
c	203	c2223	c22231	c22232	c22233	1	2	63	2	9	1	4	1	2	2	1	2	1	1	1	1	1	2	1	1	2	1	1	1	1	1	2		2	1	1	1	2	1	1	2	1	2	1	0	0	0	0	1
c	204	c2231	c22311	c22312	c22313	4	1	39	3	3	4	1	1	2	1	1	1	1	2	1	2	1	2	2	1	1	1	2	1	1	1	1	2	2	1	1	1	1	2	2	1	1	1	1	0	0	0	1	1
c	205	c2232	c22321	c22322	c22323	4	1	45	6	8	3	2	1	1	2	1	2	2	1	1	1	1	2	1	1	1	1	1	1	2	1	1	1	2	2	2	1	2	2	2	1	1	1	2	0	0	0	1	1
c	206	c2233	c22331	c22332	c22333	4	1	21	5	6	9	4	1	1	1	1	1	1	1	1	1	2	2	1	1	1	1	1	2	1	1	1	1	2	2	2	1	1	2	2	2	2	2	2	0	0	0	1	1
c	207	c2311	c23111	c23112	c23113	3	1	41	5	3	3	2	1	1	2	1	1	1	1	1	2	1	1	1	1	1	2	2	1	1	1	1	2	2	2	2	2	2	1	2	1	1	2	2	0	0	0	1	1
c	208	c2312	c23121	c23122	c23123	2	2	62	2	5	1	4	1	1	1	1	2	2	2	1	2	1	2	2	1	1	1	1	1	2	2	2	1	2	2	2	1	2	1	2	1	2	2	1	0	0	0	0	0
c	209	c2313	c23131	c23132	c23133	4	1	21	5	6	4	1	1	1	2	1	1	2	2	1	1	1	1	1	1	1	2	1	2	1	1	1	2	2	2	2	1	2	2	1	2	1	1	2	0	0	0	1	1
c	210	c2321	c23211	c23212	c23213	2	1	40	5	6	1	4	1	2	2	1	2	2		1	1	1	2	1	2	2	1	2	1	2	2	1	2	2	2	2	1	2	1	2	2	1	2	1	0	0	0	1	1
c	211	c2322	c23221	c23222	c23223	3	1	41	3	3	3	2	1	1	2	1	1	2	1	1	1	1	2	1	1	1	2	1	1	1	2	2	1	2	2	2	2	2	1	2	1	2	2	2	0	0	0	1	1
c	212	c2323	c23231	c23232	c23233	4	1	32	3	3	9	4	1	1	1	1	1	2	1	1	1	2	1	1	1	1	2	1	1	1	2	1	1	2	2	1	1	2	2	2	2	2	2	2	0	0	0	1	1
c	213	c2331	c23311	c23312	c23313	2	1	43	6	6	1	4	1	1	2	1	2	1	2	1	2	1	1	1	1	1	1	1	2	1	1	2	2	2	1	2	1	2	2	2	1	2	2	2	0	0	0	1	1
c	214	c2332	c23321	c23322	c23323	2	1	34	5	9	3	2	1	1	1	1	1	2	1	1	1	1	1	1	1	1	1	1	1	1	1	2	2	2	2	2	1	2	2	2	2	2	2	2	0	0	0	1	1
c	215	c2333	c23331	c23332	c23333	2	2	46	3	9	4	1	2	1	1	1	2	1	1	1	1	2	2	1	1	2	1	1	2	1	1	1	2	2	2	1	2	2	2	2	1	2	1	2	0	0	0	0	1
c	216	c3121	c31211	c31212	c31213	6	1	49	2	4	4	1	1	1	1	1	1	1	1	1	1	1	1	1	2	1	1	1	1	1	1	1	2	2	2	2	2	2	2	2	2	2	2	2	0	0	0	0	1
c	217	c3122	c31221	c31222	c31223	7	2	61	2	1	1	4	1	1	1	1	1	1	1	1	1	1	1	1	1	1	1	1	1	1	1	1	2	2	2	2	2	2	2	2	2	2	2	2	0	0	0	0	1
c	218	c3123	c31231	c31232	c31233	6	2	48	4	1	4	1	1	1	1	1	1	1	1	1	1	1	1	1	1	1	1	1	1	1	1	1	2	2	2	2	1	2	2	2	2	2	2	2	0	0	0	0	1
c	219	c3311	c33111	c33112	c33113	7	1	54	4	3	10	4	1	1	1	1	1	1	1	1	1	1	1	1	1	1	1	1	1	1	1	1	1	1	1	2	1	2	2	2	2	2	2	2	1	0	0	0	0
c	220	c3312	c33121	c33122	c33123	8	2	62	3	1	1	4	1	1	1	1	1	1	1	1	1	1	1	1	1	1	1	1	1	1	1	1	2	2	2	2	2	2	2	2	2	2	2	2	0	0	0	0	1
c	221	c3313	c33131	c33132	c33133	5	2	65	2	5	4	1	1	1	1	1	1	1	1	1	1	1	1	1	1	1	1	1	1	1	1	1	2	2	2	2	2	2	2	2	2	2	2	2	0	0	0	0	1
c	222	c3321	c33211	c33212	c33213	6	2	58	2	1	4	1	1	1	1	1	1	1	1	1	1	1	1	1	1	1	1	1	1	1	1	1	2	2	2	2	2	2	2	2	2	2	2	2	0	0	0	0	0
c	223	c4111	c41111	c41112	c41113	22	1	50	5	5	1	4	1	1	1	1	1	1	1	1	1	1	1	1	1	1	1	1	1	1	1	1	2	2	2	2	2	2	2	2	2	2	2	2	1	0	0	0	0
c	224	c4121	c41211	c41212	c41213	15	1	60	4	3	1	4	1		1	1	1	1	1	1			1																						1	0	0	0	0
c	225	c4122	c41221	c41222	c41223	10	1	63	6	11	1	4	1	1	1	1	1	1	1	1	1	1	1	1	1	1	1	1	1	1	1	1	2	2	2	2	2	2	2	2	2	2	2	2	0	0	0	1	0
c	226	c4123	c41231	c41232	c41233	10	2	50	6	9	4	1	1	1	1	1	1	1	1	1	1	1	1	1	1	1	1	1	1	1	1	1	2	2	2	2	2	2	2	2	2	2	2	2	1	0	0	1	0
c	227	c4131	c41311	c41312	c41313	1	2	54	2	3	1	4	1		1	1	1	1	1	1			1	1				1	1																0	0	0	1	0
c	228	c4132	c41321	c41322	c41323	11	1	73	6	11	3	2	1	1	1	1	1	1	1			1	1	1		1	1	1	1	1	1							1	1		1	1	1		1	0	0	0	0
c	229	c4133	c41331	c41332	c41333	4	2	71	2	3	2	3	1	1	1	1	1	1	1	1	1	1	1	1	1	1	1	1	1		1				2	2	2			2	2	1			1	0	0	0	0
c	230	c4211	c42111	c42112	c42113	15	1	68	3	9	3	2	1		1	1	1	1	1			1	1	1		1	1		1		1		2	2	2	2		1	1	2	2	1		2	1	0	0	0	0
c	231	c22131	c221311	c221312	c221313	3	1	52	5	5	1	4	1	1	1	2	1	1	1	2	2	1	2	1	2	1	2	1	1	1	1	1	2	1	1	2	2	2	1	2	1	2	2	2	0	0	0	1	1
c	232	c22132	c221321	c221322	c221323	2	2	30	5	6	3	2	1	2	1	1	1	2	2	1	1	1	1	1	1	1	2	1	1	1	1	2	1	2	2	1	2	2	2	2	1	1	2	2	0	0	0	1	1
c	233	c23321	c233211	c233212	c233213	3	1	21	5	6	3	2	1	2	2	1	2	2	2	1	1	1	2	1	1	1	1	1	1	2	1	2	1	1	2	1	2	2	2	2	1	2	2	2	0	0	0	1	1
c	234	c31211	c312111	c312112	c312113	6	2	63	2	5	1	4	1	1	1	1	1	1	1	1	1	1	1	1	1	1	1	1	1	1	1	1	2	2	2	2	2	2	2	2	2	2	2	2	0	0	0	0	1
c	235	c31212	c312121	c312122	c312123	7	2	47	3	4	4	1	1	1	1	1	1	1	1	1	1	1	1	1	1	1	1	1	1	1	1	1	2	2	2	2	2	2	2	2	2	2	2	2	0	0	0	0	1
c	236	c31213	c312131	c312132	c312133	7	2	32	5	6	3	2	1	1	1	1	1	1	1	1	1	1	1	1	1	1	1	1	1	1	1	2	2	2	2	2	2	2	2	2	2	2	2	2	0	0	0	0	1
c	237	c31221	c312211	c312212	c312213	4	1	60	2	1	1	4	1	1	1	1	1	1	1	1	1	1	1	1	1	1	1	1	1	1	1	1	1	2	2	2	2	2	2	2	2	2	2	2	0	0	0	0	1
c	238	c31222	c312221	c312222	c312223	4	1	71	2	9	1	4	1	1	1	1	1	1	1	1	1	1	1	1	1	1	1	1	1	1	1	1	2	2	2	2	2	2	2	2	2	2	2	2	0	0	0	0	1
c	239	c31223	c312231	c312232	c312233	5	2	52	2	1	4	1	1	1	1	1	1	1	1	1	1	1	1	1	1	1	1	1	1	1	1	1	2	2	2	2	2	2	2	2	2	2	2	2	0	0	0	0	1
c	240	c33121	c331211	c331212	c331213	8	1	69	2	1	1	4	1	1	1	1	1	1	1	1	1	1	1	1	1	1	1	1	1	1	1	1	2	2	2	2	2	2	2	2	2	2	2	2	0	0	0	0	1
c	241	c33122	c331221	c331222	c331223	5	2	57	2	1	2	3	1	1	1	1	1	1	1	1	1	1	1	1	1	1	1	1	1	1	1	1	2	2	2	2	2	2	2	2	2	2	2	2	0	0	0	0	1
c	242	c33123	c331231	c331232	c331233	5	2	55	3	5	4	1	1	1	1	1	1	1	1	1	1	1	1	1	1	1	1	1	1	1	1	1	2	2	2	2	2	2	2	2	2	2	2	2	0	0	0	0	1
c	243	c331211	c3312111	c3312112	c3312113	7	2	64	2	3	4	1	1	1	1	1	1	1	1	1	1	1	1	1	1	1	1	1	1	1	1	1	2	2	2	2	2	2	2	2	2	2	2	2	0	0	0	0	1
c	244	c331212	c3312121	c3312122	c3312123	6	1	40	4	5	10	4	1	1	1	1	1	1	1	1	1	1	1	1	1	1	1	1	1	1	1	1	2	1	2	2	2	2	2	2	2	2	2	2	0	0	0	0	1
c	245	c331213	c3312131	c3312132	c3312133	4	2	35	4	3	10	4	1	1	1	1	1	1	1	1	1	1	1	1	1	1	1	1	1	1	1	1	2	2	2	2	2	2	2	2	2	2	2	2	0	0	0	0	0
s	246	s1	s11	s12	s13	20	2	65	5	8	4	1	1	1	1	1	2	1	1	1	1	1	1	1	2	1	1	1	2	1	1	2	1	2	2	2	2	2	2	2	2	1	1	2	1	0	0	0	1
s	247	s2	s21	s22	s23	20	1	63	6	7	2	3	1	1	1	1	1	1	1	1	2	1	1	2	2	1	2	2	1	2	1	2	2	2	2	2	2	2	2	2	2	1	2	2	1	0	0	0	0
s	248	s3	s31	s32	s33	10	2	42	6	9	9	4	1	1	1	1	1	2	2	1	2	1	2	1	2	1	2	2	2	2	2	2	2	2	2	1	2	2	2	2	2	2	2	2	1	0	0	0	1
s	249	s4	s41	s42	s43	5	1	46	2	4	3	2	1	1	1	1	1	1	1	1	2	1	2	1	2	1	1	2	1	2	1	2	2	2	2	2	2	2	2	2	2	2	2	2	0	0	0	0	1
s	250	s11	s111	s112	s113	1	1	63	6	7	2	3	1	2	2	1	2	1	2	1	2	2	2	1	2	2	2	2	2	2	1	2	2	2	2	2	2	2	2	2	2	2	2	2	0	0	0	0	0
s	251	s12	s121	s122	s123	4	2	49	6	9	4	1	1	1	1	1	1	1	1	2	2	1	1	1	2	1	1	1	2	2	2	2	1	2	1	2	1	2	2	2	2	2	2	1	0	0	0	0	1
s	252	s21	s211	s212	s213	15	1	39	6	9	2	3	1	1	1	1	1	1	2	1	2	2	1	1	2	1	1	1	1	2	1	1	2	2	2	1	1	2	2	2	2	2	2	2	0	0	0	0	1
s	253	s22	s221	s222	s223	12	2	53	7	11	4	1	2	2	1	1	1	1	2	1	2	2	1	1	2	2	1	1	1	2	2	1	2	2	2	2	2	1	2	2	2	1	1	2	0	0	0	0	1
s	254	s23	s231	s232	s233	3	1	53	6	6	3	2	1	2	2	1	2	1	1	2	2	2	2	2	2	2	2	2	2	2	2	1	2	2	2	2	2	2	2	2	2	1	2	2	0	0	0	0	1
s	255	s31	s311	s312	s313	1	2	50	5	9	3	4	2	2	1	1	1	1	2	1	2	2	1	1	2	2	1	1	1	2	2	1	2	2	2	2	2	1	2	2	2	1	1	2	0	0	0	0	1
s	256	s32	s321	s322	s323	12	1	59	2	9	4	1	2	1	2	1	1	1	1	1	2	1	2	2	1	1	2	2	1	1	1	2	2	2	1	1	1	1	1	2	1	2	2	2	0	0	0	0	1
s	257	s41	s411	s412	s413	20	1	55	5	4	3	2	2	2	2	1	1	1	1	1	2	1	2	2	1	1	2	2	1	2	2	2	2	1	2	1	1	1	1	2	2	2	2	2	0	0	0	0	1
s	258	s42	s421	s422	s423	6	1	38	3	9	3	2	2	1		1	1	1	2	1	2	1	2	1	1	1	1	2	1	2	1	2	2	2	2	2	2	2	2	2	2	2	2	2	1	0	0	0	0
s	259	s43	s431	s432	s433	10	1	47	5	7	4	1	1	1	1	1	1	1	2	1	2	1	2	1	2	1	2	2	2	2	2	2	2	2	2	2	2	2	2	2	2	2	2	2	1	0	0	0	0
s	260	s121	s1211	s1212	s1213	2	1	59	4	5	2	3	1	1	2	1	1	1	1	1	2	1	2	1	2	1	2	2	1	2	1	2	2	2	2	2	2	2	2	2	2	2	2	2	1	0	0	1	1
s	261	s122	s1221	s1222	s1223		2	56	6	7	4	1	1	1	2	1	2	1	2	1	2	1	2	1	2	1	2	2	1	2	1	2	2	2	1	2	2	2	2	2	2	2	2	2	1	0	0	0	1
s	262	s123	s1231	s1232	s1233	1	2	47	3	3	2	3	1	2	1	1	1	1	1	2	2	2	1	1	2	2	2	2	1	1	1	2	2	1	2	1	1	1	1	1	2	1	1	2	0	1	0	0	0
s	263	s221	s2211	s2212	s2213	3	2	52	6	9	3	2	2	2	1	1	2	1	2	1	2	2	2	1	2	2		2	1	1	1	2	2	2	2	2	2	2	2	2	2	2	2	2	0	0	0	0	1
s	264	s231	s2311	s2312	s2313	6	2	51	6	9	4	1	1	1	1	1	1	1	1	1	1	1	2	1	2	1	1	2	2	2	1	1	1	2	2	2	2	2	1	1	2	1	2	2	0	0	0	0	0
s	265	s311	s3111	s3112	s3113	1	2	87	2	1	2	3	1	1	1	1	2	1	1	1	2	2	2	2	2	2	2	2	2	2	1	1	2	2	2	2	2	2	2	2	2	2	2	2	0	0	0	0	1
s	266	s312	s3121	s3122	s3123	1	1	61	2	9	7	4	2	1	2	1	2	1	2	1	2	2	2	1	2	1	2	2	2	2	1	2	2	2	2	2	2	2	2	2	2	2	2	2	0	0	0	0	1
s	267	s313	s3131	s3132	s3133	4	2	52	6	9	4	1	2	1	2	1	1	1	1	1	2	1	1	2	2	1	1	2	2	2	2	1	2	2	2	2	2	2	2	2	2	2	2	2	0	0	0	0	1
s	268	s321	s3211	s3212	s3213	10	1	57	6	9	2	3	1	1	1	1	1	1	2	1	2	1	1	1	1	1	1	1	1	1	1	1	2	1	2	2	2	2	2	2	2	2	2	2	1	0	0	0	0
s	269	s411	s4111	s4112	s4113	2	2	45	5	9	3	2	2	1	1	1	1	1	1	1	2	1	1	1	1	1	1	1	1	1	1	1	2	2	2	2	2	2	2	2	2	2	2	2	1	1	0	0	0
s	270	s412	s4121	s4122	s4123	2	1	51	5	9	4	1	2	2	2	1	1	1	1	1	2	1	2	2	2	2	2	2	2	2	2	2	1	2	2	1	1	1	1	2	2	1	1	1	1	0	0	0	0
s	271	s431	s4311	s4312	s4313	2	2	32	6	7	4	1	1	1	1	1	1	1	1	1	2	1	1	1	1	1	1	1	1	1	1	1	2	2	2	2	2	2	2	2	2	2	2	2	1	0	0	0	0
s	272	s432	s4321	s4322	s4323	5	2	47	2	3	3	2	2	1	2	1	2	1	1	1	2	2	2	1	2	1	2	2	2	2	1	2	2	2	2	1	2	2	2	2	2	2	2	2	0	0	0	0	1
s	273	s1211	s12111	s12112	s12113	5	2	69	3	9	2	3	1	1	1	1	1	1	1	1	1	1	1	1	2	1	1	2	2	2	1	2	2	2	2	2	2	2	2	2	2	2	2	2	0	0	0	0	1
s	274	s1221	s12211	s12212	s12213	3	2	52	5	5	8	4	1	1	1	1	1	1	1	1	1	1	2	1	2	1	1	2	2	2	2	2	1	2	2	2	1	1	1	2	2	1	1	2	1	0	0	0	0
s	275	s1231	s12311	s12312	s12313	1	2	51	3	9	3	2	2	2	2	1	1	1	1	1	2	1	2	2	2	2	2	2	2	2	1	2	2	2	2	2	2	2	1	2	2	1	1	2	1	0	0	0	1
s	276	s2211	s22111	s22112	s22113	3	1	76	6	7	3	2	1	1	1	1	1	1	1	1	1	1	1	1	1	1	1	1	2	2	1	2	1	2	2	2	1	1	1	2	2	1	1	2	0	0	0	0	1
s	277	s2212	s22121	s22122	s22123	2	1	62	6	7	8	4	1	1	1	1	1	1	1	1	1	1	1	1	2	1	2	1	1	1	1	2	2	2	1	2	2	1	2	1	2	1	1	2	1	0	0	0	0
s	278	s2213	s22131	s22132	s22133	4	2	40	6	7	3	2	2	2	1	1	1	1	1	2	2	1	2	1	2	2	2	2	2	2	1	2	2	2	2	2	2	2	2	2	2	2	2	2	1	0	0	1	1
s	279	s3121	s31211	s31212	s31213	1	1	62	6	8	3	2	1	2	1	1	2	2	2	1	2	2	2	1	2	1	1	2	1	1	2	2	1	2	2	2	1	2	1	1	2	2	2	2	1	0	0	0	0
s	280	s3131	s31311	s31312	s31313	2	2	73	2	1	4	1	1	1	1	1	1	1	1	1	1	1	1	1	1	1	1	1	1	1	1	1	1	1	1	1	1	1	2	2	2	2	2	2	0	0	0	1	1
s	281	s3211	s32111	s32112	s32113	2	1	55	6	8	3	2	1	2	1	1	1	1	1	1	2	2	1	1	2	2	1	1	2	2	1	1	1	1	2	1	1	2	1	1	2	1	1	2	0	0	1	0	0
s	282	s4121	s41211	s41212	s41213	1	1	60	4	4	2	3	1	1	1	1	1	1	1	1	1	1	1	1	1	1	2	1	1	1	1	1	1	1	1	1	1	1	1	1	1	2	2	2	0	0	0	1	0
s	283	s12111	s121111	s121112	s121113	5	2	54	3	9	3	2	1	1	1	1	1	1	1	1	1	2	2	1	2	2	2	1	2	2	2	1	2	2	2	2	2	2	2	2	2	1	2	2	0	0	0	1	0
s	284	s12211	s122111	s122112	s122113	3	2	53	2	5	1	4	1	2	1	1	1	1	1	1	1	2	2	2	2	1	2	2	2	2	1	2	1	1	2	1	2	1	1	2	1	1	1	2	0	0	0	1	0
s	285	s22111	s221111	s221112	s221113	10	1	68	2	4	2	3	1	2	1	1	1	1	2	1	1	2	2	2	2	2	2	1	2	2	1	1	2	2	2	2	2	1	2	2	2	1	2	2	0	0	0	0	1
s	286	s22121	s221211	s221212	s221213	6	1	57	5	8	10	2	1	1	1	1	2	1	1	1	1	1	1	1	2	1	1	1	1	1	1	2	1	1	1	1	1	1	1	1	2	2	2	2	0	0	1	1	0
s	287	s22131	s221311	s221312	s221313	2	1	55	5	4	2	3	1	1	2	1	2	1	1	1	2	2	2	1	2	1	1	1	1	1		2	2	2	2	1	2	2	2	2	2	2	2	2	0	0	0	0	1
s	288	s31311	s313111	s313112	s313113	2	1	55	2	8	4	1	1	1	1	1	1	2	1	1	2	1	1	1	1	1	1	1	2	1	2	2	1	1	1	1	2	1	1	1	1	1	1	2	1	0	0	0	0
s	289	s32111	s321111	s321112	s321113	20	1	57	6	8	1	4	2	2	2	1	2	1	1	2	2	2	2	2	2	2	2	2	2	2	2	2	2	2	2	1	2	1	1	1	2	1	2	2	0	0	0	0	1
s	290	s41211	s412111	s412112	s412113	1	1	65	2	1	2	3	1	2	1	1	2	2	1	1	2	2	1		2	2	2	2	2	2	1	2	1	2	2	2	2	1	2	2	2	1	2	2	0	0	0	0	1
s	291	s41212	s412121	s412122	s412123	2	1	41	2	5	2	3	1	2	2	1	1	1	1	1	2	2	2	1	2	2	2	1	1	2	1	1	2	2	2	2	2	1	2	2	2	1	1	2	0	0	0	1	1
s	292	s121111	s1211111	s1211112	s1211113	2	1	42	6	8	4	1	1	1	1	1	1	1	1	1	1	1	1	1	1	1	1	1	1	1	1	1	2	2	1	1	2	1	2	2	2	1	2	2	0	0	1	0	0
s	293	s122111	s1221111	s1221112	s1221113	10	2	43	6	8	7	4	1	1	1	1	1	1	1	1	1	1	1	1	1	1	1	1	1	1	1	1	2	2	2	2	2	2	2	2	2	2	2	2	0	0	0	0	0
s	294	s221111	s2211111	s2211112	s2211113	1	1	62	6	7	2	3	1	1	1	1	1	1	1	1	2	1	1	1	2	1	1	1	2	1	2	2	2	2	2	2	2	1	2	2	2	2	2	2	1	0	0	0	1
s	295	s313111	s3131111	s3131112	s3131113	2	1	47	5	6	9	4	1	2	1	1	1	1	2	1	2	2	1	1	2	1	1	1	1	2	1	2	1	1	2	2	2	1	1	1	2	1	1	2	0	0	0	0	1
s	296	s321111	s3211111	s3211112	s3211113	5	1	58	6	5	8	4	1	1	2	1	2	1	1	1	2	2	2	1	1	2	1	2	1	1	2	1	2	1	1	2	2	2	1	2	2	1	1	2	0	0	0	0	1
s	297	s412121	s4121211	s4121212	s4121213	2	2	43	2	5	10	4	1	2	1	1	2	1	1	1	2	2	2	1	2	2	1	1	2	2	1	1	2	2	1	2	2	2	2	1	2	1	2	2	0	0	0	0	0
s	298	s1211111	s12111111	s12111112	s12111113	2	1	61	6	9	1	4	1	1	1	1	1	2	2	1	2	2	1	1	2	1	1	1	1	2	2	1	2	2	1	2	2	2	2	1	2	2	1	2	0	0	0	0	1
s	299	s1221111	s12211111	s12211112	s12211113	1	1	54	2	4	2	3	1	1	1	1	1	1	2	1	2	2	1	1	1	1	1	2	2	2	1	1	2	2	2	2	2	2	2	2	2	1	1	2	0	0	0	0	1
s	300	s2211111	s22111111	s22111112	s22111113	2	1	37	4	6	4	1	1	2	2	1	2	2	2	1	2	2	1	1	2	2	1	2	1	2	2	2	2	2	2	2	2	2	1	2	2	2	2	2	0	0	0	0	1
s	301	s3131111	s31311111	s31311112	s31311113	1	1	45	5	5	4	1	1	2	1	1	1	1	2	1	2	2	1	1	2	2	1	2	1	1	1	1	2	2	2	2	2	2	2	2	2	2	1	2	0	0	0	0	1
s	302	s3211111	s32111111	s32111112	s32111113	1	1	49	3	9	3	2	1	1	1	1	1	1	2	1	2	2	1	1	2	1	1	1	1	2	2	1	2	2	2	1	2	2	2	1	2	2	2	2	0	0	0	0	1
s	303	s3211112	s32111121	s32111122	s32111123	2	1	58	5	7	1	4	1	2	1	1	1	1	2	1	2	2	1	2	2	1	1	2	2	1	1	2	2	2	2	1	2	2	2	2	1	1	2	2	0	0	0	0	1
s	304	s3211113	s32111131	s32111132	s32111133	6	1	58	5	6	1	4	1	2	2	1	1	1	1	1	2	2	1	1	2	2	2	2	1	2	1	1	1	2	1	2	2	2	2	1	2	2	2	2	0	0	0	0	1
s	305	s4121211	s41212111	s41212112	s41212113	2	1	71	2	4	1	4	2	2	1	1	1	1	2	1	2	2	1	1	2	2	1	2	1	2	1	1	2	1	2	2	1	2	2	1	2	1	1	2	0	0	0	0	1
s	306	s12111111	s121111111	s121111112	s121111113	1	1	50	5	9	10	1	2	1	1	1	1	1	2	1	2	2	1	2	2	1	1	2	2	2	1	1	2	2	2	2	1	2	2	2	2	1	1	2	0	0	0	0	1
s	307	s12211111	s122111111	s122111112	s122111113	4	2	65	6	1	2	3	2	1	1	1	1	1	2	1	2	2	1	1	2	1	1	2	1	2	1	1	2	2	2	2	1	2	2	2	2	2	1	2	0	0	0	0	1
s	308	s22111111	s221111111	s221111112	s221111113	1	2	56	2	11	4	1	1	1	1	1	1	1	1	1	2	2	1	1	2	1	1	1	1	2	1	1	2	1	2	1	1	1	2	2	2	2	1	2	0	0	0	0	1
s	309	s31311111	s313111111	s313111112	s313111113	6	2	55	6	8	4	1	1	1	1	1	1	1	1	1	2	2	1	1	2	1	1	1	1	2	2	1	2	2	2	2	1	2	2	2	2	2	2	2	0	0	0	0	1
s	310	s32111131	s321111311	s321111312	s321111313	6	2	58	5	7	1	4	2	2	2	1	1	1	1	2	2	2	2	2	2	2	2	2	2	2	1	2	2	1	2	2	1	2	2	2	2	2	1	2	0	0	0	0	1
s	311	s32111132	s321111321	s321111322	s321111323	2	1	58	5	5	4	1	1	2	2	1	1	1	1	1	1	1	1	1	2	2	1	1	2	1	1	1	1	2	1	1	1	1	1	1	2	1	1	1	0	0	0	0	1
s	312	s32111133	s321111331	s321111332	s321111333	2	2	54	6	9	10	1	1	1	1	1	1	1	1	1	1	1	1	1	2	1	1	1	2	1	1	2	1	1	1	2	2	1	1	2	2	2	2	2	0	0	0	1	0
s	313	s41212111	s412121111	s412121112	s412121113	2	2	67	2	4	1	4	1	2	2	1	1	1	1	1	2	1	2	1	2	2	2	2	2	2	2	1	1	1	2	2	2	1	1	2	2	1	1	1	0	0	1	0	1
s	314	s121111111	s1211111111	s1211111112	s1211111113	2	2	59	6	9	1	4	2	2	2	1	1	1	1	1	2	1	1	1	1	2	1	1	1	2	1	1	1	2	1	1	1	1	1	1	2	1	1	1	0	0	1	0	1
s	315	s122111111	s1221111111	s1221111112	s1221111113	5	2	73	6	7	2	3	1	2	1	1	1	1	1	1	2	1	1	1	2	1	1	1	1	2	1	1	1	2	2	1	1	2	1	2	2	2	2	2	0	0	0	0	1
s	316	s313111111	s3131111111	s3131111112	s3131111113	3	1	31	6	8	3	2	1	2	1	1	1	1	1	1	2	1	1	1	1	1	1	2	1	1	1	1	1	2	1	1	2	1	1	1	2	1	1	2	0	0	0	0	0
s	317	s313111112	s3131111121	s3131111122	s3131111123	5	1	24	6	8	3	2	1	2	1	1	1	1	1	1	2	1	1	1	1	2	1	1	1	1	1	2	1	1	1	2	2	1	1	1	2	1	2	2	0	0	0	0	1
s	318	s313111113	s3131111131	s3131111132	s3131111133	3	2	31	6	8	3	2	2	2	1	1	1	1	1	1	2	1	1	1	1	2	1	2	1	2	1	2	1	1	2	2	1	2	2	2	2	1	1	2	0	0	0	0	1
s	319	s321111321	s3211113211	s3211113212	s3211113213	2	2	58	5	5	10	4	1	1	1	1	1	1	1	1	2	1	1	1	2	1	1	1	1	2	1	1	2	1	1	1	2	2	1	2	2	1	1	2	0	0	0	0	1
s	320	s321111331	s3211113311	s3211113312	s3211113313	4	1	76	3	7	2	3	1	2	2	1	1	1	1	1	1	1	1	1	2	2	1	2	2	1	1	1	2	2	1	1	2	1	2	1	2	2	2	1	1	0	0	0	1
s	321	s321111332	s3211113321	s3211113322	s3211113323	4	2	48	3	3	10	1	1	2	2	1	1	1	1	1	1	1	1	1	2	2	1	2	2	1	1	1	2	2	1	1	2	1	2	1	2	2	2	1	0	0	0	0	1
s	322	s412121111	s4121211111	s4121211112	s4121211113	1	2	50	6	7	2	3	2	2	1	1	1	2	1	1	2	2	1	1	2	1	2	1	1	2	2	2	1	2	2	2	1	2	2	2	2	1	1	1	0	0	0	0	1
s	323	s3131111121	s31311111211	s31311111212	s31311111213	3	1	35	4	8	3	2	2	2	1	1	1	2	1	1	2	2	1	1	2	1	2	1	1	2	2	2	1	2	2	2	1	2	2	2	2	1	1	1	0	0	0	0	1
s	324	s3131111122	s31311111221	s31311111222	s31311111223	2	1	62	5	5	3	2	1	1	1	1	1	1	1	1	1	1	1	1	2	1	1	1	1	1	1	1	2	2	1	1	2	2	1	1	1	2	2	2	0	1	0	0	1
s	325	s3131111131	s31311111311	s31311111312	s31311111313	3	1	48	6	8	3	2	1	2	2	1	1	2	2	1	1	1	1	1	2	2	1	1	1	2	1	1	2	1	1	2	1	1	2	2	1	1	2	2	0	0	0	0	1
s	326	s3211113321	s32111133211	s32111133212	s32111133213	3	1	77	3	10	3	2	1	1	1	1	2	1	1	1	2	2	1	1	1	2	1	1	1	2	1	1	2	1	1	2	1	1	1	2	2	2	1	1	0	0	0	0	1
s	327	s4121211111	s41212111111	s41212111112	s41212111113	2	2	51	5	1	1	4	1	2	1	1	2	1	1	1	2	2	1	1	2	1	1	1	1	2	2	1	2	1	1	1	2	2	1	2	2	1	1	2	0	0	0	0	1
s	328	s31311111221	s313111112211	s313111112212	s313111112213	2	2	60	5	8	1	4	1	2	1	1	2	1	1	1	2	2	1	1	2	1	1	1	1	2	2	2	1	2	1	1	2	2	1	2	2	1	1	2	0	0	0	0	1
s	329	s32111133211	s321111332111	s321111332112	s321111332113	3	2	67	2	4	7	4	1	2	1	1	2	1	1	1	2	2	1	1	2	1	1	1	1	2	2	1	2	1	1	1	2	2	1	2	2	1	1	2	0	0	0	0	1
s	330	s32111133212	s321111332121	s321111332122	s321111332123	4	2	46	6	3	4	1	1	1	2	2	1	1	1	1	1	1	2	2	1	1	2	2	1	2	2	1	2	1	1	2	2	2	1	2	2	2	2	2	0	0	0	1	0
s	331	s12211112	s122111121	s122111122	s122111123	1	1	69	4	9	2	3	2	2	2	1	1	2	2	2	2	2	2	1	2	2	2	2	2	2	2	1	2	2	2	2	2	2	2	2	2	2	2	2	0	0	0	1	0
s	332	s122111121	s1221111211	s1221111212	s1221111213	10	2	30	6	1	2	3	1	2	1	1	1	1	2	1	2	2	1	1	2	2	1	2	1	2	2	1	2	2	2	2	1	2	2	2	2	1	1	2	0	0	0	0	1
s	333	s1221111211	s12211112111	s12211112112	s12211112113	10	2	46	6	5	2	3	2	2	2	1	1	2	1	2	2	2	1	1	2	2	2	2	1	2	1	2	2	2	2	1	2	2	2	2	2	2	2	2	0	0	0	0	1
s	334	s12211112111	s122111121111	s122111121112	s122111121113	3	2	25	5	5	2	3	2	2	2	1	1	2	1	2	2	2	1	1	2	2	2	2	1	2	2	2	2	1	2	2	2	1	2	2	2	2	1	2	0	0	0	0	1
s	335	s12211112112	s122111121121	s122111121122	s122111121123	5	1	42	6	6	2	3	1	1	1	1	1	1	1	1	2	2	2	1	2	1	1	2	1	2	1	1	2	2	2	2	1	2	2	2	2	2	1	2	0	0	0	0	1
s	336	s122111121121	s1221111211211	s1221111211212	s1221111211213	2	2	57	2	5	4	1	2	2	2	1	1	2	1	2	2	2	1	1	2	2	1	1	2	1	2	1	1	2	1	2	2	2	2	1	2	2	1	2	0	0	0	0	1
s	337	s1221111211211	s12211112112111	s12211112112112	s12211112112113	1	2	54	2	5	2	3	2	2	2	1	1	2	1	2	2	2	2	1	2	2	2	2	1	2	1	2	1	2	2	2	2	1	2	2	2	2	2	2	0	0	0	0	1
s	338	s12211112112111	s122111121121111	s122111121121112	s122111121121113	1	2	59	4	1	2	3	1	1	1	1	1	1	1	1	2	2	2	2	2	1	1	1	2	1	1	1	2	2	2	1	1	1	2	2	2	2	1	2	0	0	0	0	1
s	339	s12211112112112	s122111121121121	s122111121121122	s122111121121123	1	2	50	4	5	1	4	1	2	1	1	2	2	2	1	2	2	1	2	2	2	1	1	2	2	2	1	2	2	2	2	2	2	2	2	2	2	2	2	0	0	0	0	1
s	340	s12211112113	s122111121131	s122111121132	s122111121133	1	2	40	5	5	2	3	1	1	1	1	1	1	2	1	2	2	1	1	2	1	1	1	1	2	1	1	2	2	1	2	2	2	2	2	2	1	1	2	0	0	0	0	1
s	341	s122111121131	s1221111211311	s1221111211312	s1221111211313	1	2	60	4	1	2	3	2		1	1	1	2	2	2	2	2	2	1	2	1	1	1	2	1	2	2	2	2	2	2	2	2	2	2	2	2	2	2	0	0	0	0	1
s	342	s122111122	s1221111221	s1221111222	s1221111223	10	1	67	2	9	7	4	1	1	1	1	1	1	1	1	2	2	2	2	2	1	1	1	1	2	1	1	2	2	2	2	1	2	2	2	2	2	1	2	0	0	0	0	1
s	343	s313111112211	s3131111122111	s3131111122112	s3131111122113	2	1	61	5	5	3	2	1	2	2	1	1	2	2	1	2	1	2	2	2	2	2	1	2	2	2	2	2	2	2	2	2	2	2	2	2	2	2	2	0	0	0	0	0
s	344	s3131111122111	s31311111221111	s31311111221112	s31311111221113	1	2	34	6	6	4	1	1	2	1	1	2	1	1	1	2	2	1	1	2	1	1	1	1	2	2	1	2	1	1	1	2	2	1	2	2	1	1	2	0	0	0	0	1
s	345	s3131111122112	s31311111221121	s31311111221122	s31311111221123	1	2	42	6	8	4	1	2	2	2	1	1	1	2	1	2	2	1	1	2	2	1	2	1	2	1	1	2	2	1	2	2	2	2	2	2	2	2	2	0	0	0	0	1
s	346	s321111332121	s3211113321211	s3211113321212	s3211113321213	2	2	33	6	9	4	1	1	1	1	1	2	1	1	1	2	2	1	1	1	2	1	1	1	2	1	1	2	1	1	2	1	1	1	2	2	2	1	1	0	0	0	0	1
s	347	s3211113321211	s32111133212111	s32111133212112	s32111133212113	2	1	71	4	4	3	2	1	1	1	1	1	1	2	2	2	2	1	2	2	1	1	2	1	2	1	1	2	2	2	2	1	2	2	2	2	2	1	2	0	0	0	0	1
s	348	s32111133212111	s321111332121111	s321111332121112	s321111332121113	5	1	71	6	4	3	2	1	1	1	1	1	1	2	1	2	2	1	1	2	1	1	2	1	2	2	1	2	2	2	2	2	2	1	2	2	2	1	2	0	0	0	0	1
s	349	s321111332121111	s3211113321211111	s3211113321211112	s3211113321211113	3	1	56	6	4	3	2	2	2	2	1	1	1	1	1	2	1	2	1	1	2	2	2	2	1	1	1	1	2	2	2	2	2	2	1	2	1	1	2	0	0	0	0	1
s	350	s3211113321211111	s32111133212111111	s32111133212111112	s32111133212111113	3	2	54	6	7	3	2	1	1	1	1	1	1	1	1	2	1	1	2	1	1	1	1	2	2	1	1	1	2	1	1	2	1	1	2	2	2	2	2	0	0	0	0	1
s	351	s3211113321211112122	s32111133212111121221	s32111133212111121222	s32111133212111121223	2	1	64	5	6	1	4	1	2	1	1	1	1	1	1	2	2	2	1	1	1	1	1	1	2	1	2	2	1	1	2	2	1	2	2	2	1	1	2	0	0	0	0	0
s	352	s3211113321211112	s32111133212111121	s32111133212111122	s32111133212111123	3	2	71	6	7	1	4	1	2	1	1	1	1	1	1	1	1	1	1	1	2	1	1	1	1	1	1	2	1	1	1	1	2	1	1	2	2	1	1	0	0	0	1	1
s	353	s32111133212111121	s321111332121111211	s321111332121111212	s321111332121111213	3	1	77	6	7	1	4	1	1	1	1	1	1	1	2	2	1	1	1	2	1	1	1	1	1	1	1	2	2	1	1	2	2	2	1	2	2	1	2	0	0	0	0	0
s	354	s321111332121111211	s3211113321211112111	s3211113321211112112	s3211113321211112113	1	1	49	5	8	1	4	1	1	1	1	1	1	1	2	2	2	2	2	2	1	1	1	2	1	1	1	2	2	1	2	2	2	2	2	2	2	2	2	0	0	0	0	1
s	355	s3211113321211112111	s32111133212111121111	s32111133212111121112	s32111133212111121113	2	1	61	4	5	4	1	2	2	2	1	2	2	2	2	2	2	2	2	2	2	2	2	2	2	2	2	2	2	2	2	1	2	2	2	2	1	2	2	0	0	0	0	1
s	356	s321111332121111212	s3211113321211112121	s3211113321211112122	s3211113321211112123	10	2	60	3	7	1	4	1	1	1	1	1	1	1	1	2	1	2	2	2	1	2	1	2	1	1	1	1	1	1	2	2	2	2	2	2	1	2	2	0	0	0	0	1
s	357	s3211113321211112121	s32111133212111121211	s32111133212111121212	s32111133212111121213	1	1	60	6	7	1	4	1	1	1	1	1	1	1	1	2	1	2	2	2	1	2	1	2	1	1	1	1	1	1	2	2	2	2	2	2	1	2	2	0	0	0	0	1
s	358	s3211113321211112123	s32111133212111121231	s32111133212111121232	s32111133212111121233	1	1	54	6	9	2	3	2	2	2	1	1	1	1	1	2	2	1	2	2	2	1	2	1	2	2	1	2	2	2	2	1	2	2	2	2	2	2	2	0	0	0	0	1
s	359	s321111332122	s3211113321221	s3211113321222	s3211113321223	2	2	62	2	4	2	3	2	2	2	1	1	1	1	1	2	2	1	2	2	1	2	1	2	2	1	2	2	2	2	1	2	2	2	2	2	2	2	2	0	0	0	0	1
s	360	s32111133213	s321111332131	s321111332132	s321111332133	5	2	49	3	3	10	4	2	1	1	1	2	2	2	1	1	1	1	1	2	1	2	2	1	2	2	2	2	2	2	2	2	2	2	2	2	2	2	1	0	1	0	1	0
s	361	s321111332131	s3211113321311	s3211113321312	s3211113321313	2	1	47	5	4	4	1	2	2	2	1	1	1	1	1	2	2	1	2	2	2	1	1	1	2	1	1	2	2	2	2	1	2	2	2	2	2	1	2	0	0	0	0	1
s	362	s3211113322	s32111133221	s32111133222	s32111133223	4	1	48	4	3	10	1	1	1	1	1	1	1	1	1	1	1	1	1	2	1	1	1	1	1	1	1	1	1	2	2	1	1	2	2	2	1	1	2	0	0	0	1	1
s	363	s32111133221	s321111332211	s321111332212	s321111332213	2	1	41	6	7	4	1	1	2	1	1	1	1	1	1	2	1	2	1	2	1	1	1	2	1	1	1	1	1	2	2	2	2	2	1	2	1	2	2	0	0	0	0	0
s	364	s321111332211	s3211113322111	s3211113322112	s3211113322113	2	2	39	6	8	4	1	1	1	1	1	1	1	1	1	2	1	1	1	2	1	1	1	1	1	1	2	1	2	2	2	1	1	1	1	2	1	2	2	1	0	0	0	0
s	365	s321112	s3211121	s3211122	s3211123		1	46	5	9	3	2	1	1	1	1	1	1	1	1	2	1	1	1	2	1	1	1	1	2	1	1	2	2	1	2	2	1	2	1	2	2	2	2	0	0	0	0	1
ne	366	ne1	ne11	ne12	ne13	5	1	66		11	2	3	1	1	1	1	1	1	1	1	1	1	1	1	1	1	1	1	1	1	1	1	2	2	2	1	2	2	1	2	2	1	1	2	0	0	0	1	1
ne	367	ne2	ne21	ne22	ne23	7	2	54	6	7	4	1	1	1	1	1	1	1	1	2	2	1	1	1	2	1	1	2	2	2	1	2	2	2	2	2	2	2	2	2	2	2	2	2	0	0	1	1	1
ne	368	ne3	ne31	ne32	ne33	5	2	60	6	7	4	1	1	1	1	1		1	1	1	1	1	1	1		1	1	1		1	1		1	2	2	2	2	2	2	2	2	2	2	2	1	0	0	0	0
ne	369	ne4	ne41	ne42	ne43	5	2	42	6	7	7	4	1	2	1	1	1	1	1	1	2	1	2	2	2	1	2	2	1	2	1	1	2	2	2	2	2	2	2	2	2	2	2	2	0	1	0	0	1
ne	370	ne11	ne111	ne112	ne113	1	1	38	5	7	4	1	1	1	1	1	1	1	1	1	1	1	1	1	1	1	1	1	1	1	1	1	2	2	2	2	2	2	2	2	2	2	2	2	0	0	0	1	1
ne	371	ne12	ne121	ne122	ne123	5	1	57	6	7	4	1	1	1	1	1	1	1	1	1	1	1	1	1	1	1	1	1	1	1	1	1	2	2	2	2		1	1	2	2	1	1	2	1	0	0	0	1
ne	372	ne13	ne131	ne132	ne133	10	1	35	6	7	4	1	1	1	1	1	1	1	1	1	1	1	1	1	1	1	1	1	1	1	1	1	1	1	2	1	2	1	1	2	2	1	1	2	0	0	0	0	1
ne	373	ne21	ne211	ne212	ne213	5	1	63	2	5	2	3	1	1	2	1	1	1	1	1	2	1	1	1	2	1	1	2	1	1	1	2	2	2	2	2	2	2	2	2	2	2	2	2	0	0	1	1	1
ne	374	ne22	ne221	ne222	ne223	5	2	71	2	1	2	3	1	2	2	1	2	1	2	1	1	1	2	1	2	1	2	2	1	2	1	2	2	2	2	2	2	2	2	2	2	2	2	2	0	0	0	0	1
ne	375	ne23	ne231	ne232	ne233	4	2	71	2	1	10	4	1	1	2	1	2	1	2	1	2	1	1	1	2	1	2	2	1	2	1	2	2	2	2	2	2	2	2	2	2	2	2	2	0	0	0	0	1
ne	376	ne31	ne311	ne312	ne313	20	2	65	6	7	1	4	1	1	1	1	1	1	1	1	1	1	1	1	1	1	1	1	1	1	1	1	1	1	1	1	1	1	1			1	1	2	1	1	1	1	1
ne	377	ne32	ne321	ne322	ne323	10	1	52	6	9	2	3	1	1	1	1	1	1	1	1	1	1	1	1		1	1	1	1	1	1		1				2		2					2	1	1	1	1	1
ne	378	ne33	ne331	ne332	ne333	10	1	66	6	7	10	4	1	1	1	1	1	1	1	1	1	1	1	1	1	1	1	1	1	1	1	1	1	1	1	1	1	1	1	1	1	1	1	2	1	1	1	1	1
ne	379	ne41	ne411	ne412	ne413	5	1	72	2	1	2	3	1	1	1	1	1	1	1	1	1	1	1	1	1	1	1	1	1	1	1	1	2	2	2	2	2	2	2	2	2	2	2	2	0	1	0	0	1
ne	380	ne42	ne421	ne422	ne423	3	2	69	4	1	8	4	1	1	1	1	1	1	1	1	1	1	1	1	1	1	1	1	1	1	1	1	2	2	2	2	2	2	1	2	2	1	2	2	0	0	0	0	1
ne	381	ne43	ne431	ne432	ne433	5	1	59	2	4	4	1	1	1	1	1	1	1	1	1	1	1	1	2	2	1	1	1	2	1	1	2	2	2	1	1	2	2	2	2	2	2	1	1	0	0	0	0	1
ne	382	ne121	ne1211	ne1212	ne1213	5	1	41	6	7	4	1	1	1	1	1	1	1	1	1	1	1	1	1	1	1	1	1	1	1	1	1	1	2	2	1	2	2	1	2	2	1	1	2	0	0	0	0	1
ne	383	ne122	ne1221	ne1222	ne1223	3	1	50	6	7	2	3	1	1	1	1	1	1	1	1	1	1	1	1	1	1	1	1	1	1	1	1	2	2	2	2	2	2	2	2	2	2	2	2	0	0	0	0	1
ne	384	ne123	ne1231	ne1232	ne1233	5	1	65	6	11	4	1	1	1	1	1	1	1	1	1	1	1	1	1	1	1	1	1	1	1	1	1	1	2	2	2	2	1	1	2	2	1	2	2	0	0	0	1	1
ne	385	ne131	ne1311	ne1312	ne1313	7	1	54	5	7	4	1	1	1	1	1	1	1	1	1	2	1	1	1	2	1	2	2	1	1	1	1	1	2	2	2	2	2	1	2	2	1	1	2	0	0	0	0	1
ne	386	ne132	ne1321	ne1322	ne1323	5	1	51	6	7	4	1	1	1	1	1	1	1	1	1	1	1	1	1	2	1	1	1	2	1	1	1	1	2	2	2	2	1	1	2	2	2	1	2	0	0	0	0	1
ne	387	ne133	ne1331	ne1332	ne1333	5	1	67	4	1	1	4	1	1	1	1	1	1	1	1	2	1	1	1	2	1	1	1	1	1	1	1	2	2	1	2	1	1	1	2	2	1	1	2	0	0	0	0	1
ne	388	ne211	ne2111	ne2112	ne2113	1	1	62	3	9	10	4	1	1	1	1	1	1	1	1	1	1	1	1	2	1	1	1	1	1	1	2	2	2	2	2	2	2	2	2	2	2	2	2	1	1	1	1	1
ne	389	ne212	ne2121	ne2122	ne2123	30	1	62	6	7	1	4	1	1	1	1	1	1	1	1	1	1	1	2	2	1	1	1	1	1	1	2	2	2	2	2	2	2	2	2	2	2	2	2	1	1	1	1	1
ne	390	ne221	ne2211	ne2212	ne2213	2	1	71	6	11	2	3	1	2	2	1	1	1	1	1	2	1	1	1	2	1	2	2	2	2	1	2	2	2	2	2	2	2	2	2	1	2	2	2	0	1	0	0	1
ne	391	ne222	ne2221	ne2222	ne2223	1	2	72	2	1	2	2	1	1	2	1	2	1	1	1	2	2	1	1	2	1	1	1	1	1	1	1	2	2	1	2	2	1	1	2	2	1	1	2	0	0	0	1	0
ne	392	ne223	ne2231	ne2232	ne2233	2	2	58	6	7	2	3	1	1	1	1	1	1	1	1	1	1	1	1	2	1	1	1	1	1	1	1	1	1	2	2	2	2	2	1	1	2	2	2	1	1	1	1	0
ne	393	ne231	ne2311	ne2312	ne2313	2	1	39	6	8	4	1	1	1	2	1	1	1	1	2	2	1	1	1	2	1	2	1	2	1	1	2	1	1	2	1	1	2	1	2	2	2	2	2	0	0	1	0	0
ne	394	ne232	ne2321	ne2322	ne2323	1	2	30	6	6	9	4	2	2	2	1	2	1	1	2	2	2	2	2	2	2	2	2	2	2	1	2	2	2	2	2	2	2	2	2	2	1	1	2	0	0	0	0	1
ne	395	ne311	ne3111	ne3112	ne3113	10	2	62	6	7	2	3	1	1	1	1	1	1	1	1	1	1	1	1	1	1	1	1	1	1	1	1	1	1	1	1	1	1	1	1	1	1	1	2	1	1	1	1	1
ne	396	ne312	ne3121	ne3122	ne3123	10	2	60	6	7	3	2	1	1	1	1	1	1	1	1	1	1	1	1	1	1	1	1	1	1	1	1	1	1	1	1	1	1	1	1	1	1	1	2	1	1	1	1	1
ne	397	ne313	ne3131	ne3132	ne3133	5	2	41	6	7	10	4	1	1	1	1	1	1	1	1	1	1	1	1	1	1	1	1	1	1	1	1	1	1	1	1	1	1	1	1	1	1	1	2	1	1	1	1	1
ne	398	ne321	ne3211	ne3212	ne3213	50	1	60	6	7	9	4	1	1	1	1	1	1	1	1	1	1	1	1	1	1	1	1	1	1	1	1	1	1	1	1	1	1	1	1	1	1	1	2	1	1	1	1	1
ne	399	ne322	ne3221	ne3222	ne3223	10	1	58	3	10	4	1																																	0	0	0	0	0
ne	400	ne323	ne3231	ne3232	ne3233	10	1	70	4	10	8	4	1	1	1	1	1	1	1	1	1	1	1	1	2	1	1	1	1	1	1	1	1	1	2	1	1	1	1	2	2	1	1	2	1	1	1	1	1
ne	401	ne331	ne3311	ne3312	ne3313	10	2	66	6	7	1	4	1	1	1	1	1	1	1	1	1	1	1	1	1	1	1	1	1	1	1	2	1	1	1	1	1			2	2	1	1	2	1	1	1	1	1
ne	402	ne332	ne3321	ne3322	ne3323	10	1	72	6	7	10	4	1	1	1	1	1	1	1	1	1	1	1	1	1	1	1	1	1	1	1	1	1	1	1	1	1	1	1	1	1	1	1	2	1	1	1	1	1
ne	403	ne333	ne3331	ne3332	ne3333	5	1	70	6	7	8	4	1	1	1	1	1	1	1	1	1	1	1	1	1	1	1	1	1	1	1	1	1	1	1	1	1	1	1	1		1	1	2	1	1	1	1	1
ne	404	ne411	ne4111	ne4112	ne4113	5	2	50	4	4	2	3	1	2	2	1	1	1	1	1	1	2	2	1	2	2		2	1	2	1	1	2	2	2	2	2	2	2	2	2	2	2	2	0	0	0	1	0
ne	405	ne412	ne4121	ne4122	ne4123	1	1	63	2	5	4	1	1	1	1	1	2	2	2	1	2	2	2	2	2	2	2	2	1	1	1	1	2	2	2	2	2	2	2	2	2	2	2	2	0	0	0	1	1
ne	406	ne413	ne4131	ne4132	ne4133	5	2	70	2	1	4	1	1	1	1	1	1	1	1	1	1	1	1	1	1	1	1	1	1	1	1	1	2	2	2	2	1	2	2	2	2	1	2	2	0	0	0	0	1
ne	407	ne421	ne4211	ne4212	ne4213	2	2	66	2	5	3	2	1	2	1	1	2	1	2	2	2	1	2	2	2	2	2	2	1	2	1	1	2	2	2	2	2	2	2	2	2	2	2	2	0	0	0	0	0
ne	408	ne422	ne4221	ne4222	ne4223	3	1	53	4	5	3	2	1	2	1	1	1	1	1	2	2	1	2	1	2	2	1	1	1	2	1	2	2	2	2	2	1	1	2	2	2	2	2	2	0	0	0	0	1
ne	409	ne431	ne4311	ne4312	ne4313	10	2	51	4	1	2	3	1	1	1	1	1	1	1	1	1	1	1	1	1	1	1	1	1	1	1	1	2	2	2	1	2	1	2	2	2	1	2	2	0	0	0	0	1
ne	410	ne432	ne4321	ne4322	ne4323	1	1	60	2	4	1	4	1	2	1	1	2	2	2	1	2	2	2	2	2	2	2	1	2	2	2	1	2	2	2	2	1	2	2	2	2	2	2	2	0	0	0	0	0
ne	411	ne433	ne4331	ne4332	ne4333	5	1	66	6	11	2	3	1	1	1	1	1	1	1	1	2	1	1	2	2	1	1	1	1	1	1	2	2	2	2	2	2	1	1	2	2	1	1	2	0	0	0	1	1
ne	412	ne1211	ne12111	ne12112	ne12113	5	1	62	6	11	2	3	1	1	1	1	1	1	1	1	2	2	1	1	2	1	1	1	1	1	1	1	1	2	2	1	2	1	2	2	2	1	1	2	1	0	0	1	1
ne	413	ne1212	ne12121	ne12122	ne12123	5	1	56	6	7	1	4	1	1	1	1	1	1	1	1	1	1	1	1	2	1	1	2	1	1	1	1	2	2	2	1	2	1	2	2	2	2	1	2	0	0	0	1	1
ne	414	ne1213	ne12131	ne12132	ne12133	3	1	49	6	7	3	2	1	1	1	1	1	1	1	1	1	1	1	1	1	1	1	1	1	1	1	1	1	2	2	1	2	1	2	2	2	1	2	2	0	0	0	0	1
ne	415	ne2121	ne21211	ne21212	ne21213	2	1	78	1	9	10	4	1	1	1	1	1	1	1	1	1		1	1	1	1	1	1	1	1	1	1	2	2	2	1	1	1	1	1	1	1	1	2	1	1	1	1	1
ne	416	ne2122	ne21221	ne21222	ne21223	2	2	53	4	3	3	4	1	1	1	1	1	1	1	1	1	1	1	1	1	1	1	1	1	1	1	1	1	1	1	1	1	1	1	2	2	1	1	2	1	1	1	1	1
ne	417	ne2123	ne21231	ne21232	ne21233	10	2	67	6	7	2	3	1	1	1	1	1	1	1	1	1	1	1	1	1	1	1	1	1	1	1	2	2	2	2	2	2	2	2	2	2	2	2	2	1	1	1	1	1
ne	418	ne2311	ne23111	ne23112	ne23113	4	2	43	6	7	4	1	1	1	1	1	1	1	1	1	1	1	1	1	2	1	1	1	1	1	1	1	2	2	2	2	1	1	2	1	2	1	1	2	0	1	0	0	1
ne	419	ne3111	ne31111	ne31112	ne31113	10	2	23	6	2	1	4	1	1	1	1	1	1	1	1	1	1	1	1	2	1	1	1	1	1	1	2	1	1	1	1	1	1	1	2	2	2	1	2	1	1	1	1	1
ne	420	ne3112	ne31121	ne31122	ne31123	4	1	75	2	4	2	3	1	1		1	1		1	1	1	1	1	1			1		1	1	1													2	0	1	0	0	1
ne	421	ne3113	ne31131	ne31132	ne31133	5	2	65	2	4	4	1	1	1	1	1	1	1	1	1	1	1	1	1	1	1	1	1	1	1	1	1	1	1	1	1	1	1	1	1	1	1	1	2	1	1	1	1	1
ne	422	ne3121	ne31211	ne31212	ne31213	10	2	59	6	7	1	4	1	1	1	1	1	1	1	1	1	1	1	1	1	1	1	1	1	1	1	1	1	1	1	1	1	1	1	1	1	1	1	2	1	1	1	1	1
ne	423	ne3122	ne31221	ne31222	ne31223	10	2	58	6	9	10	1	1	1	1	1	1	1	1	1	1	1	1	1	1	1	1	1	1	1	1	1	1	1	2	1	1	1	1	2	2	1	1	2	1	1	1	1	1
ne	424	ne3123	ne31231	ne31232	ne31233	10	1	44	6	7	1	4	1	1	1	1	1	1	1	1	1	1	1	1	1	1	1	1	1	1	1	2	1	1	2	2	1	1	1	2	2	2	2	2	1	1	1	1	1
ne	425	ne3131	ne31311	ne31312	ne31313	3	1	72	6		10	4	1	1	1	1	1	1	1	1	1	1	1	1		1	1	1	1	1	1					2		2	2			2	2	2	1	1	1	1	1
ne	426	ne3132	ne31321	ne31322	ne31323	3	1	58	6	7	1	4	1	1	1	1	1	1	1	1	1	1	1	1	2	1	1	1	1	1	1				2			2	1			1	1	2	1	1	1	1	1
ne	427	ne3133	ne31331	ne31332	ne31333	2	2	36	4	9	10	4	1	1	1	1	1	1	1	1	1	1	1	1	1	1	1	1	1	1	1	1	1	1	1	1	1	1	1	1	1	1	1	2	1	1	1	1	1
ne	428	ne3211	ne32111	ne32112	ne32113	10	2	63	6	9	8	4	1	1	1	1	1	1	1	1	1	1	1	1	1	1	1	1	1	1	1	1	1	1	1	1	1	1	1	1	1	1	1	2	1	1	1	1	1
ne	429	ne3212	ne32121	ne32122	ne32123	10	2	51	6	6	6	4	1	1	1	1	1	1	1	1	1	1	1	1	1	1	1	1	1	1	1	1	1	1	1	1	1	1	1	1	1	1	1	2	1	1	1	1	1
ne	430	ne3213	ne32131	ne32132	ne32133	5	1	52	6	9	7	4	1	1	1	1	1	1	1	1	1	1	1	1	1	1	1	1	1	1	1		1	1	1	1	1	1	1		1	1	1	2	1	1	1	1	1
ne	431	ne3221	ne32211	ne32212	ne32213	3	1	50	3	3	2	3	1	1	1	1	1	1	1	1	1	1	1	1		1	1	1	1	1	1	1		2	2		2	2				2	2	2	1	1	1	0	1
ne	432	ne3222	ne32221	ne32222	ne32223	2	2	19	2	2	10	1	1							1		1	1	1			1											2							0	0	0	0	1
ne	433	ne3223	ne32231	ne32232	ne32233	2	1	57	6	7	1	4	1	1	1	1	1	1	1	1	1	1	1	1		1	1	1	1	1	1		1	1	1	1	1	1	1			1	1	2	1	1	1	1	1
ne	434	ne3231	ne32311	ne32312	ne32313	1	1	65	3	4	10	4	1	1	1	1	1	1	1	1	1	1	1	1		1	1		1	1	1				2	2	2	2	2			2	2	2	1	0	0	0	1
ne	435	ne3232	ne32321	ne32322	ne32323	1	2	67	6	7	2	3	1	1	1	1	1	1	1	1	1	1	1	1	1	1	1	1	1	1				2				2	2	2	2	2	2	2	1	1	1	1	1
ne	436	ne3233	ne32331	ne32332	ne32333	5	2	63	6	7	2	3	1	1	1	1	1	1	1	1	1	1	1	1	1	1	1	1	1	1		1	2	2		2	2	2	1	2		1	2	2	1	1	1	1	1
ne	437	ne3311	ne33111	ne33112	ne33113	10	1	40	6	9	3	2	1	1	1	1	1	1	1	1	1	1	1	1	1	1	1	1	1	1	1	1	1	1	1	1	1	1	1	1	1	1	1	2	1	1	1	1	1
ne	438	ne3312	ne33121	ne33122	ne33123	5	2	49	2	4	2	3	1	1	1	1	1	1	1	1	1	1	1	1	1	1	1	1	1	1	1	1	1	1	1	1	1	1	1	1	1	1	1	2	1	1	1	0	1
ne	439	ne3321	ne33211	ne33212	ne33213	2	2	50	6	7	4	1	1	1	1	1	1	1	1	1	1	1	1	1	1	1	1	1	1	1	1	1	1	2	2	2	2	2	2	2	2	2	2	2	1	1	1	0	1
ne	440	ne3322	ne33221	ne33222	ne33223	2	2	66	6	7	1	4	1	1	1	1	1	1	1	1	1	1	1	1	1	1	1	1	1	1	1	1	1	1	1	1	1	1	1	1		1	1	2	1	1	1	1	1
ne	441	ne3323	ne33231	ne33232	ne33233	1	2	77		1	4	1	1	1	1	1	1	1	1	1	1	1	2	2	2	1	2	1	2	1	1	2	2	2	2	1	1	2	2	1	1	1	1	2	0	0	0	0	1
ne	442	ne3331	ne33311	ne33312	ne33313	5	1	60	6	7	1	4	1	1	1	1	1	1	1	1	1	1	1	1	1	1	1	1	1	1	1	1	1	1	1	1	1	1	1	1		1	1	2	1	1	1	1	1
ne	443	ne3332	ne33321	ne33322	ne33323	1	2	60	3	3	2	3	1	1	1	1	1	1	1	1	1	1	1	1	1	1	1	1	1	1	1		1	2	2			2	1			2	2	2	1	1	1	1	1
ne	444	ne3333	ne33331	ne33332	ne33333	10	2	58	6	7	3	2	1	1	1	1	1	1	1	1	1	1	1	1	2	1	1	1	1	1	1	2	1	2	2	1	1	1	1	1	1	1	1	2	1	1	1	1	1
ne	445	ne4111	ne41111	ne41112	ne41113	2	1	74	2	4	1	4	1	1	2	1	2	2	1	2	2	2	2	1	2	1	2	2	1	2	2	2	2	2	2	2	2	2	2	2	2	2	2	2	0	0	0	0	0
ne	446	ne4112	ne41121	ne41122	ne41123	1	2	45	2	4	2	3	1	2	2	1	1	1	1	1	2	2	2	1	1	2	2	2	2	2	1	2	1	2	2	2	2	2	2	2	2	2	2	2	0	0	0	1	0
ne	447	ne4131	ne41311	ne41312	ne41313	4	2	60	6	7	3	2	1	2	1	1	1	1	1	1	2	1	1	1	2	1	1	1	1	1	1	1	2	2	2	1	2	2	2	2	2	1	2	2	0	0	0	1	0
ne	448	ne4211	ne42111	ne42112	ne42113	5	2	54	5	4	2	3	1	1	1	1	1	1	1	1	2	1	1	1	2	1	1	1	1	1	1	2	1	1	2	2	1	2	2	2	2	1	2	1	0	0	0	0	0
ne	449	ne4221	ne42211	ne42212	ne42213	5	2	78	6	11	3	2	2	2	2	1	1	1	1	2	2	2	2	2	2	1	2	2	1	2	2	2	2	2	2	2	1	2	2	2	2	1	2	2	0	0	0	1	0
ne	450	ne4222	ne42221	ne42222	ne42223	1	1	63	2	11	7	4	2	2	2	1	2	2	2	2	2	2	2	2	2	2	2	1	1	2	1	2	2	2	2	2	1	1	2	2	2	1	2	2	0	0	0	0	0
ne	451	ne4311	ne43111	ne43112	ne43113	10	2	47	6	1	3	2	2	1	2	1	1	1	1	1	2	1	2	2	2	1	2	1	1	1	1	2	1	2	2	2	2	2	2	2	2	1	1	2	0	0	0	1	0
ne	452	ne4312	ne43121	ne43122	ne43123	3	2	67	2	1	10	4	1	1	1	1	1	1	1	1	1	1	1	1	1	1	1	1	1	1	1	1	1	1	1	1	2	2	2	2	2	2	2	2	0	0	0	0	0
ne	453	ne4331	ne43311	ne43312	ne43313	1	1	65	6	11	3	2	2	2	1	1	1	1	1	1	2	2	2	1	2	2	2	2	2	2	1	2	1	1	1	1	1	1	1	1	2	1	1	2	0	0	0	0	1
ne	454	ne12111	ne121111	ne121112	ne121113	5	2	60	5	1	2	3	1	1	1	1	1	1	1	1	1	1	1	1	1	1	1	1	1	1	1	1	2	2	1	2	2	1	2	2	2	1	2	2	0	0	0	0	1
ne	455	ne12112	ne121121	ne121122	ne121123	1	2	48	6	7	3	2	1	1	1	1	1	1	1	1	2	1	1	1	2	1	1	1	1	1	1	2	2	1	2	1	1	1	2	1	2	1	2	2	0	0	1	0	1
ne	456	ne12113	ne121131	ne121132	ne121133	1	1	28	4	3	3	2	1	1	1	1	1	1	1	1	2	1	1	1	1	1	1	1	1	1	1	2	2	2	2	2	2	1	2	2	2	2	1	2	0	0	0	0	0
ne	457	ne12121	ne121211	ne121212	ne121213	1	2	38	6	6	1	4	1	1	1	1	1	1	1	1	1	1	1	2	2	1	1	1	1	1	1	2	2	2	2	1	1	1	2	1	2	1	2	2	0	0	0	0	1
ne	458	ne12122	ne121221	ne121222	ne121223	4	2	48	6	7	2	3	1	1	1	1	1	1	2	1	2	1	1	1	1	1	1	1	1	1	1	1	2	2	2	2	1	2	2	1	2	2	2	2	0	1	0	0	1
ne	459	ne12123	ne121231	ne121232	ne121233	1	1	72	6	11	3	2	1	1	1	1	1	1	1	1	1	1	1	1	2	1	1	1	1	1	1	2	1	1	1	2	1	2	1	2	2	2	2	2	0	1	0	1	1
ne	460	ne21231	ne212311	ne212312	ne212313	5	1	34	6	7	4	2	1	1	2	1	1	1	1	1	2	2	1	1	2	1	1	1	1	1	1	2	1	1	2	2	1	2	2	2	2	2	2	2	0	0	1	0	1
ne	461	ne21232	ne212321	ne212322	ne212323	2	1	54	5	9	1	4	1	1	1	1	1	1	1	1	1	1	1	1	1	1	1	1	1	1	1	2	2	2	2	2	2	2	2	2	2	2	2	2	0	0	0	0	0
ne	462	ne21233	ne212331	ne212332	ne212333	5	1	51	3	4	2	3	1	1	1	1	1	1	1	1	1	1	1	1	1	1	1	1	1	1	1	1	1	1	1	1	1	1	1	1	1	1	1	2	1	1	1	1	1
ne	463	ne23111	ne231111	ne231112	ne231113	3	2	37	6	9	4	4	1	2	1	1	1	1	2	2	2	1	2	2	2	2	2	1	2	2	1	2	2	1	2	1	1	1	1	2	2	1	1	2	0	0	0	0	0
ne	464	ne23112	ne231121	ne231122	ne231123	1	2	56	6	7	3	2	1	1	1	1	1	1	1	1	1	1	1	1	1	1	1	1	1	1	1	1	1	2	2	2	2	2	2	2	2	2	2	2	1	1	1	1	1
ne	465	ne31211	ne312111	ne312112	ne312113	10	2	62	3	6	2	3	1	1	1	1	1	1	1	1	1	1	1	1		1			1	1	1				2		2					2	2	2	1	1	1	1	1
ne	466	ne31212	ne312121	ne312122	ne312123	4	2	59	4	9	8	4	1	1	1	1	1	1	1	1	1	1	1	1		1	1	1	1	1	1				1	1	1	1	1			1	1	2	1	1	1	1	1
ne	467	ne31213	ne312131	ne312132	ne312133	3	2	61	2	4	1	4	1	1		1	1		1	1	1	1		1		1			1		1				1				1			1		2	0	1	0	0	1
ne	468	ne31231	ne312311	ne312312	ne312313	3	2	87	6	7	3	2	1	1	1	1	1	1	1	1	1	1	1	1	1	1	1	1	1	1	1	2	1	1	2	2	1	2	2	2	1	1	1	2	1	1	1	1	1
ne	469	ne31232	ne312321	ne312322	ne312323	5	1	62	3	3	2	3	1	1		1	1	1	1	1		1	1	1		1	1	1	1	1	1				1		2	1	2			2	2	2	0	0	0	0	1
ne	470	ne31233	ne312331	ne312332	ne312333	10	1	74	6	7	1	4	1	1	1	1	1	1	1	1	1	1	1	1	1	1	1	1	1	1	1	1	1	1	1							1	1	2	1	1	1	1	1
ne	471	ne31311	ne313111	ne313112	ne313113	2	1	51	3	4	10	4	1	1	1	1	1	1	1	1	1	1	1	1	1	1	1	1	1	1	1	1	1	1	1	1	1	1	1	1	2	1	1	2	1	1	0	1	0
ne	472	ne31321	ne313211	ne313212	ne313213	2	2	51	6	7	1	4	1	1	1	1	1	1	1	1	1	1	1	1	1	1	1	1	1	1	1	1	1	1	1	1	1	1	1	1	2	1	1	2	1	1	1	1	0
ne	473	ne32111	ne321111	ne321112	ne321113	10	1	68	6	7	6	4	1	1	1	1	1	1	1	1	1	1	1	1	1	1	1	1	1	1	1	1	1	1	1	1	1	1	1	1	1	1	1	2	1	1	1	1	1
ne	474	ne32121	ne321211	ne321212	ne321213	2	1	50	6	9	4	4	1	1	1	1	1	1	1	1	1	1	1	1	1	1	1	1	1	1	1	1	1	1	1	1	1	1	1	1	1	1	1	2	1	1	1	1	1
ne	475	ne33111	ne331111	ne331112	ne331113	1	2	47	6	9	2	3	1	1	1	1	1	1	1	1	1	1	1	1		1	1	1	1	1	1							2	2	2	2	2	2	2	1	1	1	1	1
ne	476	ne33112	ne331121	ne331122	ne331123	1	2	44	6	9	1	4	1	1	1	1	1	1	1	1	1	1	1	1		1	1		1	1	1				2		2	2				2	2	2	1	1	1	1	1
ne	477	ne33113	ne331131	ne331132	ne331133	2	2	52	6	9	3	2	1	1	1	1	1	1	1	1	1	1	1	1	1	1	1	1	1	1	1	1	1	1	1	1	1	1	1	2	2	1	1	2	1	1	1	1	1
ne	478	ne33121	ne331211	ne331212	ne331213	1	1	42	6	5	3	2	1	1	1	1	1	1	1	1	1	1	1	1	1	1	1	1	1	1	1	1	1	1	1	1	1	1	1	1	1	1	1	1	0	0	0	1	0
ne	479	ne33122	ne331221	ne331222	ne331223	1	1	78	2	9	3	2	1	1	1	1	1	1	1	1	1	1	1	1		1	1	1	1	1					2	2	2	2	2				2	2	1	1	1	1	0
ne	480	ne33123	ne331231	ne331232	ne331233	1	2	64			3	2	2	2	1	1	1	1	1	1	1	1	2	1	2	2	2	2	2	2	2	2	2	2	2	2	2	2	2	2	2	2	2	2	0	0	0	1	0
ne	481	ne33331	ne333311	ne333312	ne333313	1	1	49	4	4	10	4	1	1	1	1	1	1	1	1	1	1	1	1	1	1	1	1	1	1	1	1						2	2	2	2	2	2	2	0	1	1	0	1
ne	482	ne212331	ne2123311	ne2123312	ne2123313	1	1	55	6	7	10	4	1	1	1	1	1	1	1	1	2	1	1	1	2	1	1	1	1	1	1	2	1	1	2	2	1	1	1	2	2	1	1	2	0	0	0	0	1
ne	483	ne212332	ne2123321	ne2123322	ne2123323	1	1	59	6	7	1	4	1	2	2	2	2	1	2	1	2	2	2	2	2	2	2	2	2	2	2	2	2	2	2	2	2	2	2	2	2	2	2	2	0	0	0	1	0
ne	484	ne212333	ne2123331	ne2123332	ne2123333	1	1	67	6	11	1	4	1	2	2	1	2	1	1	1	2	2	2	2	2	2	2	2	2	2	2	2	2	2	2	2	2	2	2	2	2	2	2	2	0	0	1	0	1
ne	485	ne312111	ne3121111	ne3121112	ne3121113	1	2	58	6	7	2	3	1	1	1	1	1	1	1	1	1	1	1	1	1	1	1	1	1	1	1	1	1	1	1	1	1	1	1	1	1	1	1	2	1	1	1	1	1
[truncated: 4 more columns]

## Sheet: Code
Variable	Code	description
Region	n	north
	c	center
	s	south
	ne	nostrthea
coupon		coupon number
C1		coupon number
C2		coupon number
C3		coupon number
Network		network size
Gender	1	male
	2	female
Age		age in years
Education	1	not study
	2	primary school
	3	junior high school
	4	senior high school
	5	vocational college
	6	university or higher
Occupation	1	unemployed
	2	student
	3	labour
	4	farmer, gardener, agricultural worker
	5	entrepreneur
	6	private employee
	7	government official
	8	state enterprise employee
	9	private business/business owner
	10	priest
	11	other
con_use1	condition for use
	1	DM, HT, chelesterolemia
	2	CA breast, prostate, lymphnodes, liver, lung, colon, renal tube, bladder
	3	stressed, anxiety, depression, bipolar, insomnia, menopausal, Alzheimer
	4	pains of muscles, knee, back, joints, hip, period pain, office syndrome, migraine, muscle imflamation
	5	AIDS
	6	tumors of breast, prostate, bladder, hemorrhoid, bladder stone ก้อนที่เต้านม ต่อมลูกหมาก กระเพาะปัสสาวะ ต่อมลูกหมากโต ริดสีดวง นิ่วในกระเพาะปัสสาวะ
	7	lung disease, COPD, mild heart disease
	8	contact dermatitis, anemia, herpes zoster, allergy, psoriasis
	9	Parkinson
	10	etc.
con_use2	Conditions for use according to MoPH
	1	A. With strong evidence of benefits
	2	B. With some evidence of benefits
	3	C. With Not enough evidence at present
	4	D. Others
Perceived benefits and harms of medical cannabis
v501	1 Yes 2 No	Treatment of chronic pain in adults
v502	1 Yes 2 No	An antiemesis for patients who receive chemotherapy
V503	1 Yes 2 No	Treatment of spasticity in multiple sclerosis
v504	1 Yes 2 No	Improvement of insomnia
v505	1 Yes 2 No	Increased appetite in HIV/AIDS patients
v507	1 Yes 2 No	Improved PTSD symptoms
v508	1 Yes 2 No	Treatment of cancers
v509	1 Yes 2 No	Treatment of brain tumour
v512	1 Yes 2 No	Treatment of Parkinson’s disease
v513	1 Yes 2 No	Treatment of substance dependence
v515	1 Yes 2 No	Treatment of intractable epilepsy in children
v517	1 Yes 2 No	Treatment of Alzheimer’s disease
v519	1 Yes 2 No	Treatment of generalized anxiety disorder
v520	1 Yes 2 No	Decreased severity of chronic cough
v521	1 Yes 2 No	Palpitations
v522	1 Yes 2 No	Panic symptoms
v523	1 Yes 2 No	Dementia, memory impairment, amotivation
v524	1 Yes 2 No	Schizophrenia-like psychotic symptoms
v525	1 Yes 2 No	Severe dry mouth
v526	1 Yes 2 No	Slow reaction time, abnormal sensory-motor function
v527	1 Yes 2 No	Hallucinations
v528	1 Yes 2 No	Acute hypotension
v529	1 Yes 2 No	Decreased sperm count, infertility
v530	1 Yes 2 No	Ataxia, uncontrollable body coordination
v531	1 Yes 2 No	Blurred vision
v532	1 Yes 2 No	Hepatitis
source1	Source of cannabis:
	1	Legal sources included medical cannabis clinics (modern and traditional medicine) in MoPH hospitals and private clinics where providers have been certified by the MoPH,
	2	Illegal sources included illegal traders, not-for-profit provider groups and clandestine growers or producers.
Source of information
v431	1 Yes 0 No	User network, association
v432	1 Yes 0 No	hospital
v433	1 Yes 0 No	sale website
v434	1 Yes 0 No	social media -facebook, instragram, line
v435	1 Yes 0 No	friends
v436	1 Yes 0 No	undergraound dealers
v437	1 Yes 0 No	governemnt organisation
v438	1 Yes 0 No	etc
